# Supplementary material
Source: HighWire-hosted journal article supplement (https://erj.ersjournals.com/content/50/2/1602426)
Supplement: inline-supplementary-material-3 [file inline-supplementary-material-3.pdf]

## Question #1: Should NIV be used in acute hypercapnic respiratory failure due to an acute exacerbation of COPD (AECOPD)?

Mortality (1.1.1 & 1.1.2 in acidotic patients)

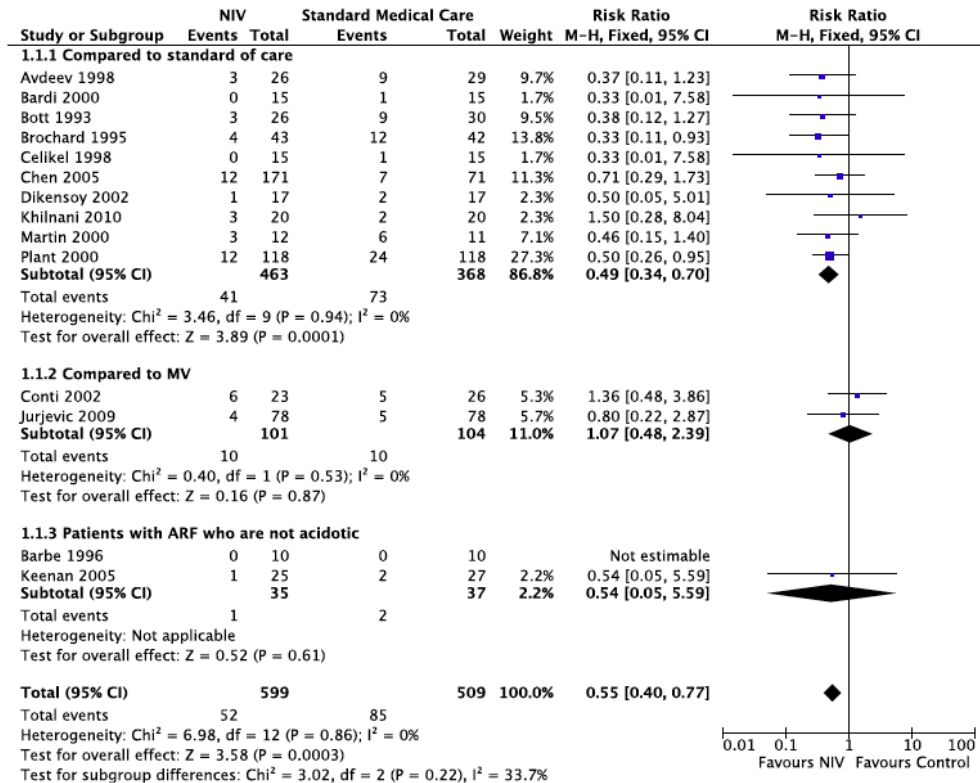

## Intubation

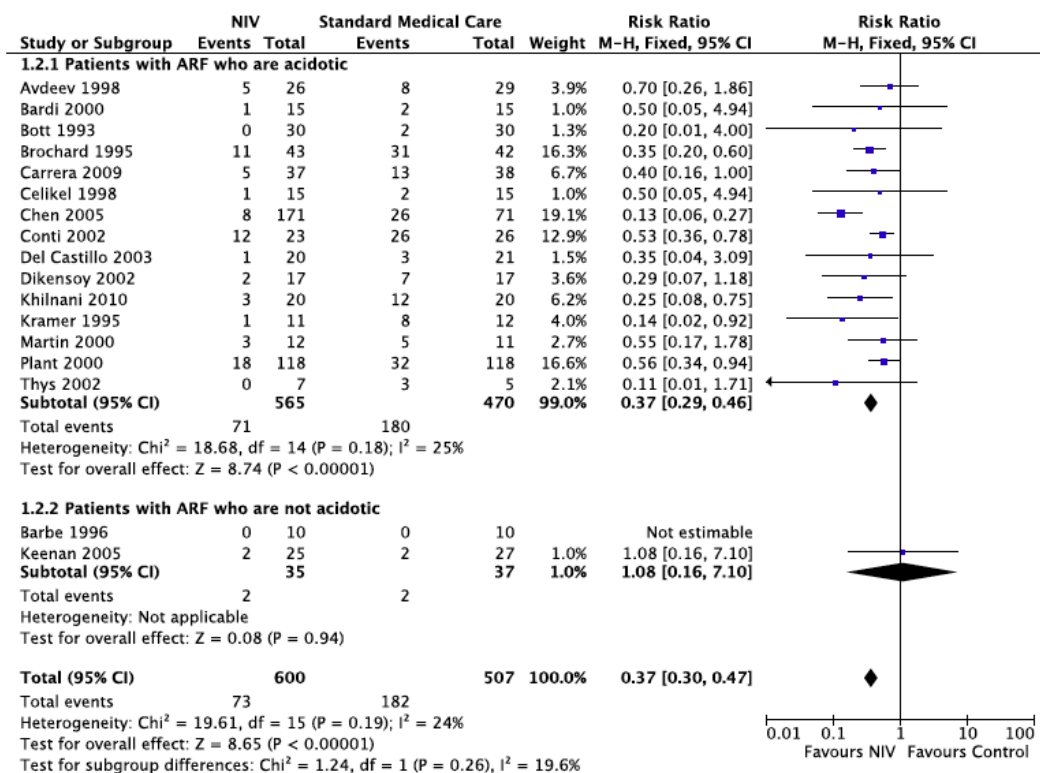

## Nosocomial Pneumonia

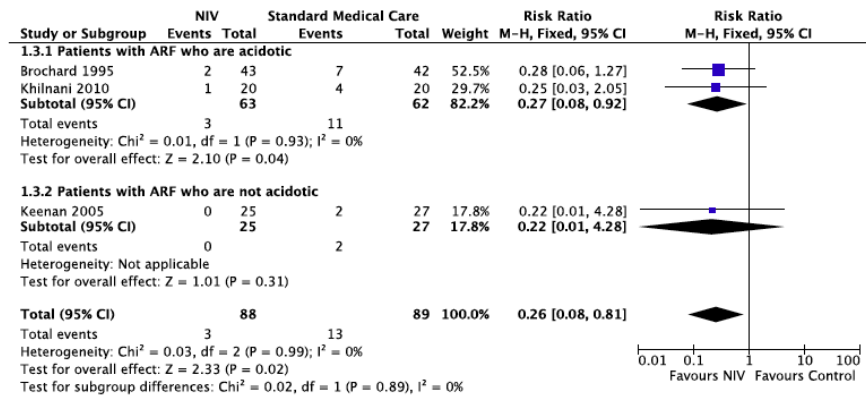

## Evidence Profile

| Quality assessment   |                   |                      |               |                      |             |                      | № of patients  |                                                         | Effect                 |                                                  | Quality          | Importance |
|----------------------|-------------------|----------------------|---------------|----------------------|-------------|----------------------|----------------|---------------------------------------------------------|------------------------|--------------------------------------------------|------------------|------------|
| № of studies         | Study design      | Risk of bias         | Inconsistency | Indirectness         | Imprecision | Other considerations | NIV            | supplemental oxygen +/- invasive mechanical ventilation | Relative (95% CI)      | Absolute (95% CI)                                |                  |            |
| Mortality            |                   |                      |               |                      |             |                      |                |                                                         |                        |                                                  |                  |            |
| 14 [1-14]            | randomised trials | not serious          | not serious   | not serious          | not serious | strong association   | 52/599 (8.7%)  | 85/609 (14.0%)                                          | RR 0.63 (0.46 to 0.87) | 52 fewer per 1000 (from 18 fewer to 75 fewer)    | ⊕⊕⊕⊕<br>HIGH     | CRITICAL   |
| Intubation           |                   |                      |               |                      |             |                      |                |                                                         |                        |                                                  |                  |            |
| 17 [1-9, 11-18]      | randomised trials | serious <sup>1</sup> | not serious   | not serious          | not serious | strong association   | 73/600 (12.2%) | 182/607 (30.0%)                                         | RR 0.41 (0.33 to 0.52) | 177 fewer per 1000 (from 144 fewer to 201 fewer) | ⊕⊕⊕○<br>MODERATE | CRITICAL   |
| Nosocomial Pneumonia |                   |                      |               |                      |             |                      |                |                                                         |                        |                                                  |                  |            |
| 3 [6, 11, 12]        | randomised trials | serious <sup>1</sup> | not serious   | serious <sup>2</sup> | not serious | none                 | 3/88 (3.4%)    | 13/89 (14.6%)                                           | RR 0.26 (0.08 to 0.81) | 108 fewer per 1000 (from 28 fewer to 134 fewer)  | ⊕⊕○○<br>LOW      | CRITICAL   |

MD – mean difference, RR – relative risk, NIV – noninvasive ventilation, CI – Confidence interval

1. Lack of blinding of intervention in all included trials.
2. Variable definition of nosocomial pneumonia used across studies with variable severity and perceived importance to patients.

## Question #2a: Should NIV be used in acute respiratory failure due cardiogenic pulmonary edema (CPE)?

### Mortality

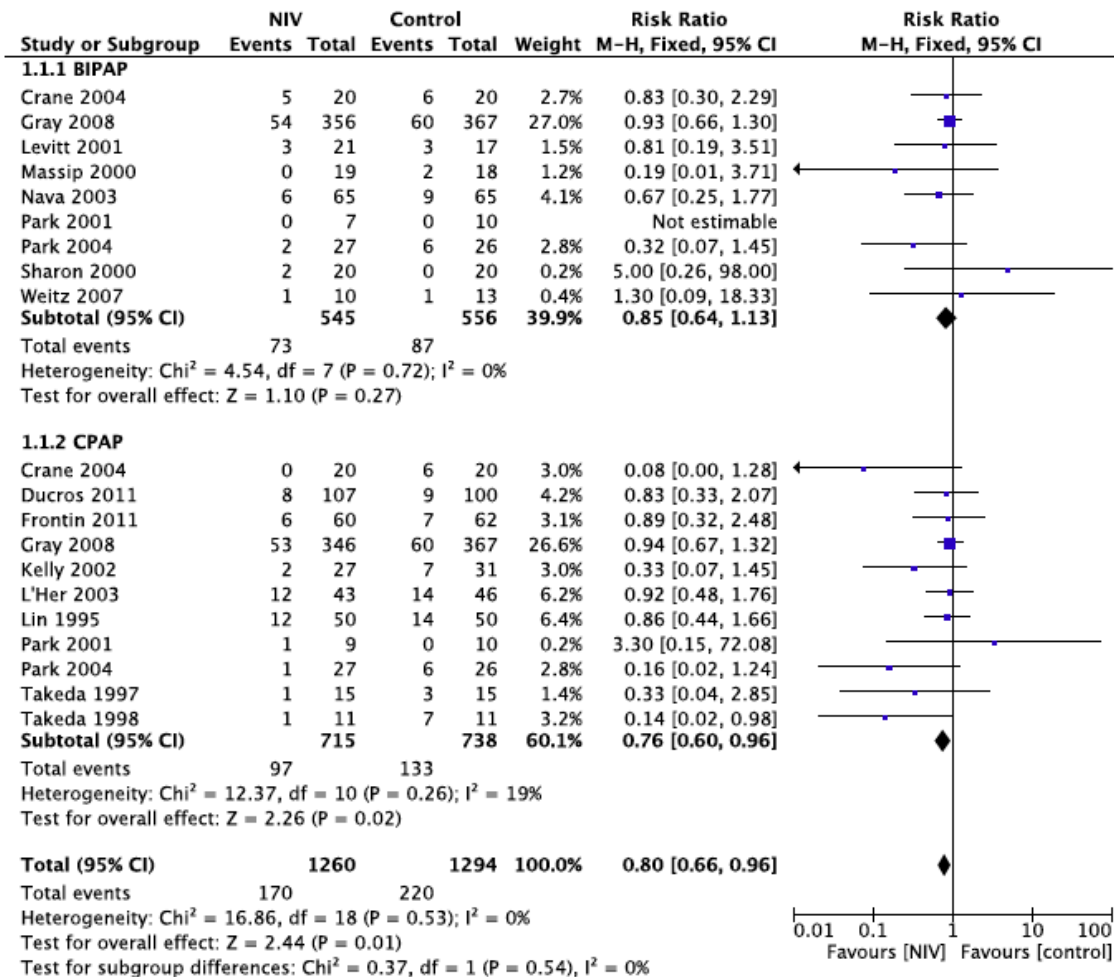

## Intubation

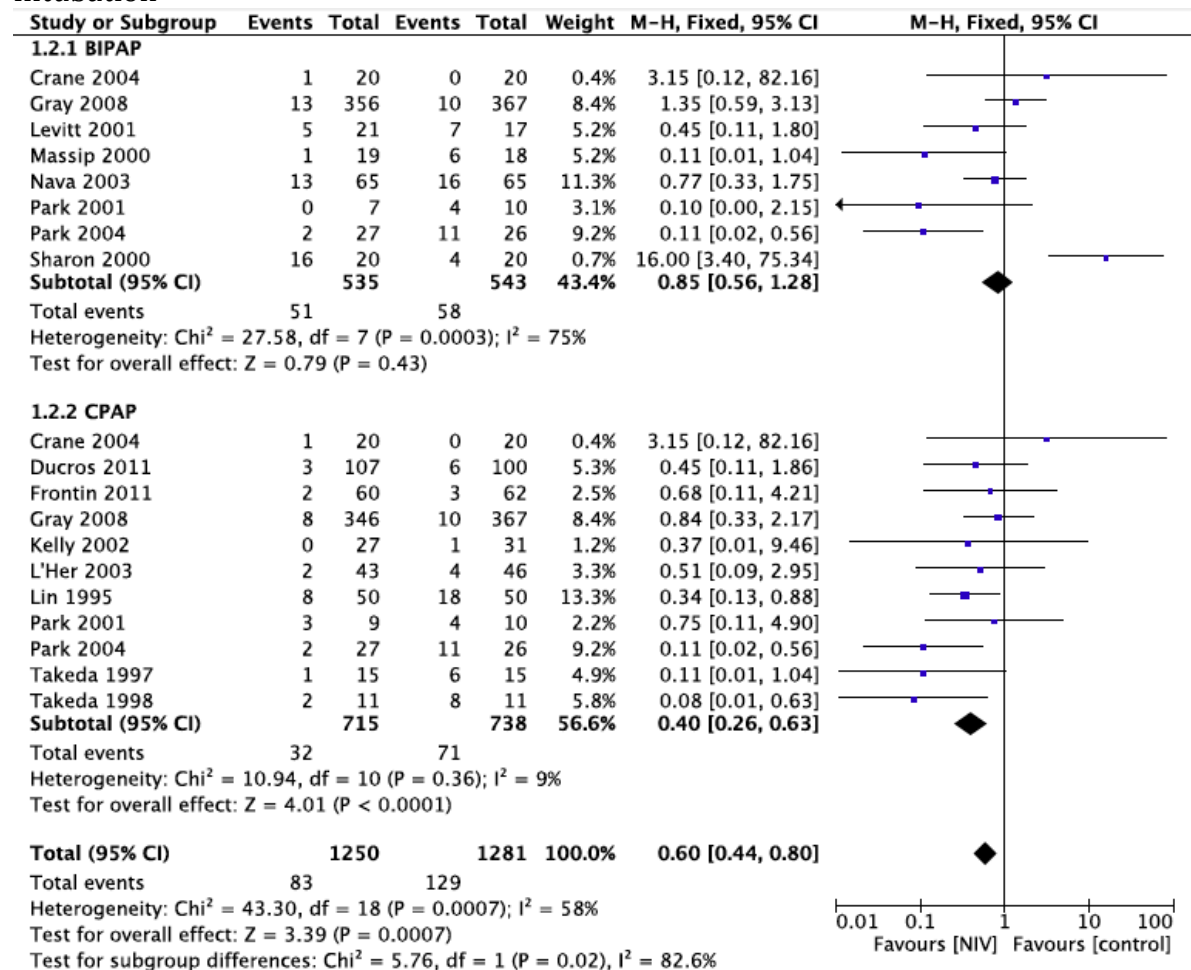

## Acute myocardial infarction

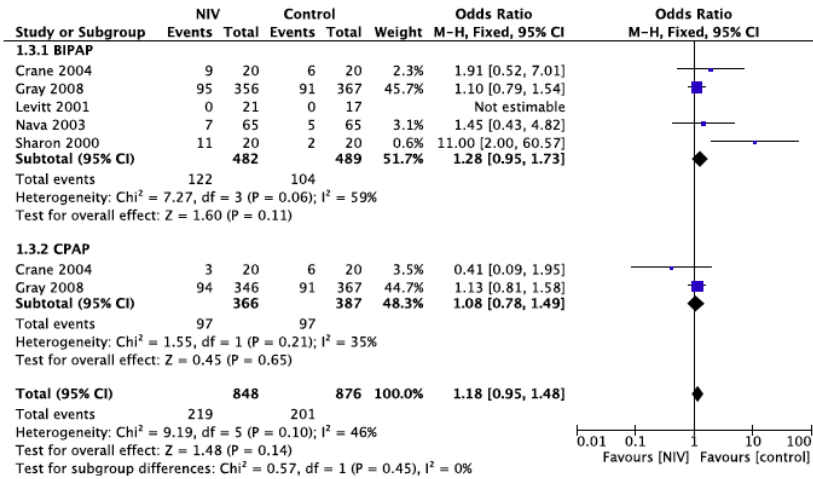

## Evidence Profile

| Quality assessment                                                                 |                   |                      |                      |                      |                      |                      | № of patients       |                                                         | Effect                    |                                               | Quality          | Importance |
|------------------------------------------------------------------------------------|-------------------|----------------------|----------------------|----------------------|----------------------|----------------------|---------------------|---------------------------------------------------------|---------------------------|-----------------------------------------------|------------------|------------|
| № of studies                                                                       | Study design      | Risk of bias         | Inconsistency        | Indirectness         | Imprecision          | Other considerations | NIV                 | supplemental oxygen +/- invasive mechanical ventilation | Relative (95% CI)         | Absolute (95% CI)                             |                  |            |
| Mortality (assessed with: longest available)                                       |                   |                      |                      |                      |                      |                      |                     |                                                         |                           |                                               |                  |            |
| 16<br>[19-34]                                                                      | randomised trials | serious <sup>1</sup> | not serious          | not serious          | not serious          | none                 | 170/1260<br>(13.5%) | 220/1294 (17.0%)                                        | RR 0.80<br>(0.66 to 0.96) | 34 fewer per 1000 (from 7 fewer to 58 fewer)  | ⊕⊕⊕○<br>MODERATE | CRITICAL   |
| Intubation                                                                         |                   |                      |                      |                      |                      |                      |                     |                                                         |                           |                                               |                  |            |
| 15<br>[19-33]                                                                      | randomised trials | serious <sup>1</sup> | serious <sup>2</sup> | not serious          | not serious          | none                 | 83/1250<br>(6.6%)   | 129/1281 (10.1%)                                        | RR 0.60<br>(0.44 to 0.80) | 40 fewer per 1000 (from 20 fewer to 56 fewer) | ⊕⊕○○<br>LOW      | CRITICAL   |
| Acute Myocardial infarction (assessed with: criteria reported in individual study) |                   |                      |                      |                      |                      |                      |                     |                                                         |                           |                                               |                  |            |
| 5<br>[19, 22, 25, 28, 31]                                                          | randomised trials | serious <sup>1</sup> | not serious          | serious <sup>2</sup> | serious <sup>4</sup> | none                 | 219/848<br>(25.8%)  | 201/876 (22.9%)                                         | OR 1.18<br>(0.95 to 1.48) | 41 more per 1000 (from 11 fewer to 110 more)  | ⊕○○○<br>VERY LOW | IMPORTANT  |

MD – mean difference, RR – relative risk, NIV – noninvasive ventilation, CI – Confidence interval

1. Included study stopped early for harm.
2. Isquared = 60%, visually evident statistical heterogeneity
3. Variable diagnostic criteria for AMI used between studies.
4. Wide confidence intervals that do not exclude benefit.



## Question #2b: Should patients with acute respiratory failure due to cardiogenic pulmonary edema receive a trial of

### CPAP to prevent deterioration prior to hospitalization?

#### Mortality

##### 1.1.3 Pre-hospital

|                          |   |            |   |            |             |                          |
|--------------------------|---|------------|---|------------|-------------|--------------------------|
| Ducros 2011              | 8 | 107        | 9 | 100        | 4.5%        | 0.83 [0.33, 2.07]        |
| Frontin 2011             | 6 | 60         | 7 | 62         | 3.3%        | 0.89 [0.32, 2.48]        |
| Weitz 2007               | 1 | 10         | 1 | 13         | 0.4%        | 1.30 [0.09, 18.33]       |
| <b>Subtotal (95% CI)</b> |   | <b>177</b> |   | <b>175</b> | <b>8.2%</b> | <b>0.88 [0.45, 1.70]</b> |

Total events

15

17

Heterogeneity:  $\text{Chi}^2 = 0.10$ ,  $\text{df} = 2$  ( $P = 0.95$ );  $I^2 = 0\%$

Test for overall effect:  $Z = 0.39$  ( $P = 0.70$ )

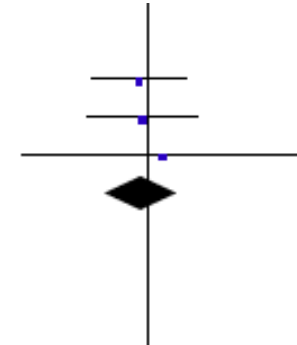

#### Intubation

##### 1.2.3 Pre-hospital

|                          |   |            |    |            |              |                          |
|--------------------------|---|------------|----|------------|--------------|--------------------------|
| Ducros 2011              | 3 | 107        | 6  | 100        | 4.5%         | 0.45 [0.11, 1.86]        |
| Frontin 2011             | 2 | 60         | 3  | 62         | 2.1%         | 0.68 [0.11, 4.21]        |
| Plaissance 2007          | 6 | 63         | 16 | 61         | 10.9%        | 0.30 [0.11, 0.82]        |
| Roessler 2012            | 1 | 24         | 6  | 25         | 4.2%         | 0.14 [0.02, 1.25]        |
| Thompson 2008            | 7 | 35         | 17 | 34         | 10.2%        | 0.25 [0.09, 0.73]        |
| <b>Subtotal (95% CI)</b> |   | <b>289</b> |    | <b>282</b> | <b>31.8%</b> | <b>0.31 [0.17, 0.55]</b> |

Total events

19

48

Heterogeneity:  $\text{Chi}^2 = 1.67$ ,  $\text{df} = 4$  ( $P = 0.80$ );  $I^2 = 0\%$

Test for overall effect:  $Z = 3.94$  ( $P < 0.0001$ )

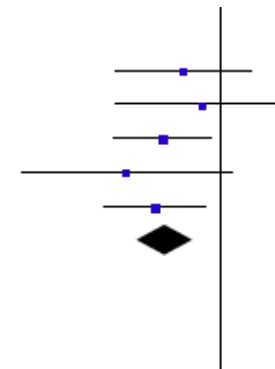

## Evidence Profile

| Quality assessment   |                   |                          |               |              |                      |                      | № of patients |                                                         | Effect                 |                                                 | Quality          | Importance |
|----------------------|-------------------|--------------------------|---------------|--------------|----------------------|----------------------|---------------|---------------------------------------------------------|------------------------|-------------------------------------------------|------------------|------------|
| № of studies         | Study design      | Risk of bias             | Inconsistency | Indirectness | Imprecision          | Other considerations | NIV           | supplemental oxygen +/- invasive mechanical ventilation | Relative (95% CI)      | Absolute (95% CI)                               |                  |            |
| Mortality            |                   |                          |               |              |                      |                      |               |                                                         |                        |                                                 |                  |            |
| 3<br>[20, 21, 34]    | randomised trials | not serious <sup>1</sup> | not serious   | not serious  | serious <sup>2</sup> | none                 | 15/177 (8.5%) | 17/175 (9.7%)                                           | RR 0.88 (0.45 to 1.70) | 12 fewer per 1000 (from 53 fewer to 68 more)    | ⊕⊕⊕○<br>MODERATE | CRITICAL   |
| Intubation           |                   |                          |               |              |                      |                      |               |                                                         |                        |                                                 |                  |            |
| 5<br>[20, 21, 35-37] | randomised trials | serious <sup>3</sup>     | not serious   | not serious  | serious <sup>4</sup> | none                 | 19/289 (6.6%) | 48/282 (17.0%)                                          | RR 0.31 (0.17 to 0.55) | 117 fewer per 1000 (from 77 fewer to 141 fewer) | ⊕⊕○○<br>LOW      | CRITICAL   |

MD – mean difference, RR – relative risk , NIV – noninvasive ventilation, CI – Confidence interval

1. Lack of blinding but not lowered for ROB given objective nature of outcome.
2. Wide confidence intervals do not exclude harm or benefit and low number of events.
3. Lack of blinding for all studies.
4. Although point estimate and confidence interval suggest benefit there is a low number of events lowering overall certainty.

### Question #3: Should NIV be used in acute respiratory failure due to an acute exacerbation of asthma?

#### Intubation

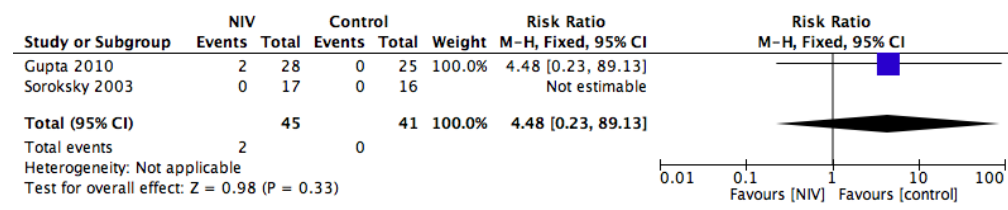

#### FEV1 Change

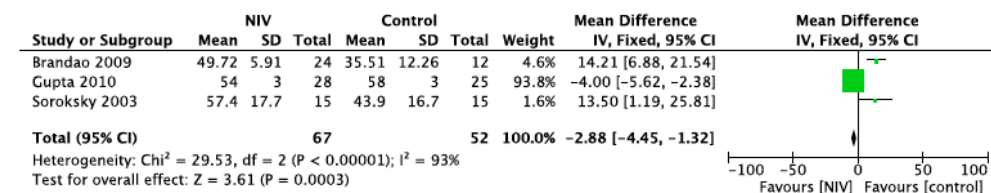

#### Peak Expiratory Flow

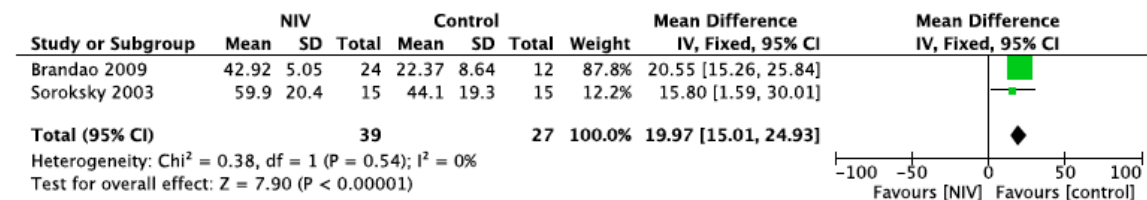

## Evidence Profile

| Quality assessment                                                                           |                   |                      |               |                      |                           |                      | № of patients  |                                                         | Effect                     |                                                   | Quality                                                                                          | Importance |
|----------------------------------------------------------------------------------------------|-------------------|----------------------|---------------|----------------------|---------------------------|----------------------|----------------|---------------------------------------------------------|----------------------------|---------------------------------------------------|--------------------------------------------------------------------------------------------------|------------|
| № of studies                                                                                 | Study design      | Risk of bias         | Inconsistency | Indirectness         | Imprecision               | Other considerations | NIV            | supplemental oxygen +/- invasive mechanical ventilation | Relative (95% CI)          | Absolute (95% CI)                                 |                                                                                                  |            |
| Hospital Mortality                                                                           |                   |                      |               |                      |                           |                      |                |                                                         |                            |                                                   |                                                                                                  |            |
| 2<br>[38, 39]                                                                                | randomised trials | serious <sup>1</sup> | not serious   | not serious          | very serious <sup>2</sup> | none                 | 0/45<br>(0.0%) | 0/41 (0.0%)                                             | not estimable              | not estimable                                     | <br>VERY LOW  | CRITICAL   |
| Intubation                                                                                   |                   |                      |               |                      |                           |                      |                |                                                         |                            |                                                   |                                                                                                  |            |
| 2<br>[38, 39]                                                                                | randomised trials | serious <sup>1</sup> | not serious   | not serious          | very serious <sup>3</sup> | none                 | 2/45<br>(4.4%) | 0/41 (0.0%)                                             | RR 4.48<br>(0.23 to 89.13) | 0 fewer per 1000 (from 0 fewer to 0 fewer)        | <br>VERY LOW  | CRITICAL   |
| Forced Expiratory Volume in 1 second Change (measured with % predicted, higher being better) |                   |                      |               |                      |                           |                      |                |                                                         |                            |                                                   |                                                                                                  |            |
| 3<br>[38-40]                                                                                 | randomised trials | serious <sup>1</sup> | not serious   | serious <sup>4</sup> | not serious               | none                 | 39             | 27                                                      | -                          | MD 14.02 higher<br>(7.73 higher to 20.32 higher)  | <br>LOW       | IMPORTANT  |
| Peak Expiratory Flow (measured with % predicted, higher being better)                        |                   |                      |               |                      |                           |                      |                |                                                         |                            |                                                   |                                                                                                  |            |
| 2<br>[39, 40]                                                                                | randomised trials | serious <sup>1</sup> | not serious   | serious <sup>4</sup> | not serious               | none                 | 39             | 27                                                      | -                          | MD 19.97 higher<br>(15.01 higher to 24.93 higher) | <br>LOW       | IMPORTANT  |
| ICU Length of Stay                                                                           |                   |                      |               |                      |                           |                      |                |                                                         |                            |                                                   |                                                                                                  |            |
| 1<br>[39]                                                                                    | randomised trials | serious <sup>5</sup> | not serious   | serious <sup>4</sup> | serious <sup>6</sup>      | none                 | 15             | 15                                                      | -                          | MD 0.3 higher<br>(0.63 lower to 1.23 higher)      | <br>VERY LOW | IMPORTANT  |

MD – mean difference, RR – relative risk, NIV – noninvasive ventilation, CI – Confidence interval

- individual study low ROB in 1 study, moderate in the other
- Point estimate not estimable due to no events in included studies.
- Very wide confidence intervals with low number of events.
- Surrogate outcome with unclear clinical implications to patients.
- Moderate ROB in individual study.
- Very wide confidence intervals.

## Question #4: Should NIV be used in acute respiratory failure in immunocompromised patients?

### Mortality

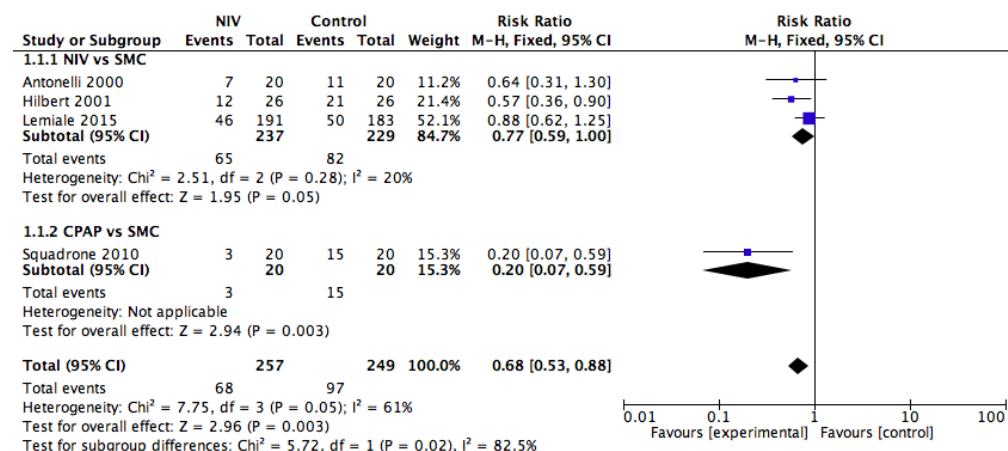

### Intubation

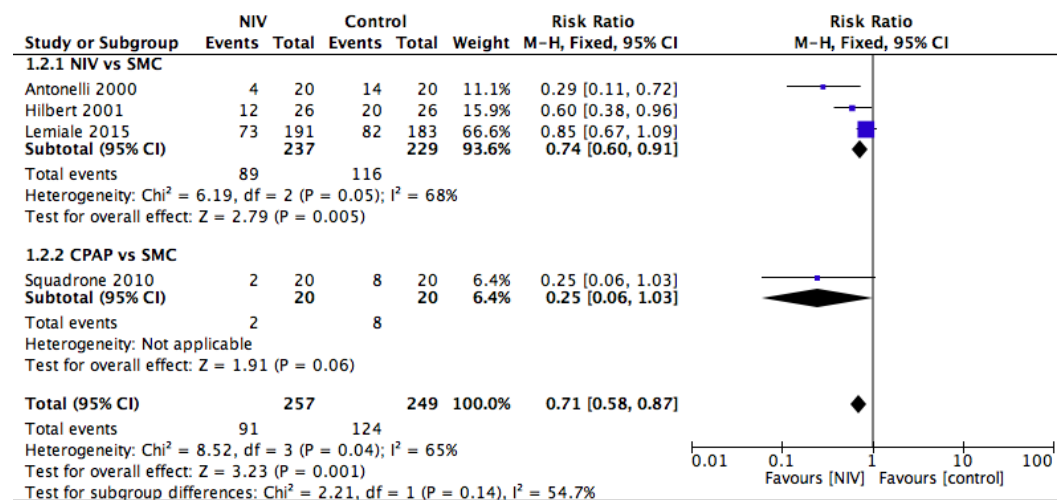

## Nosocomial Pneumonia

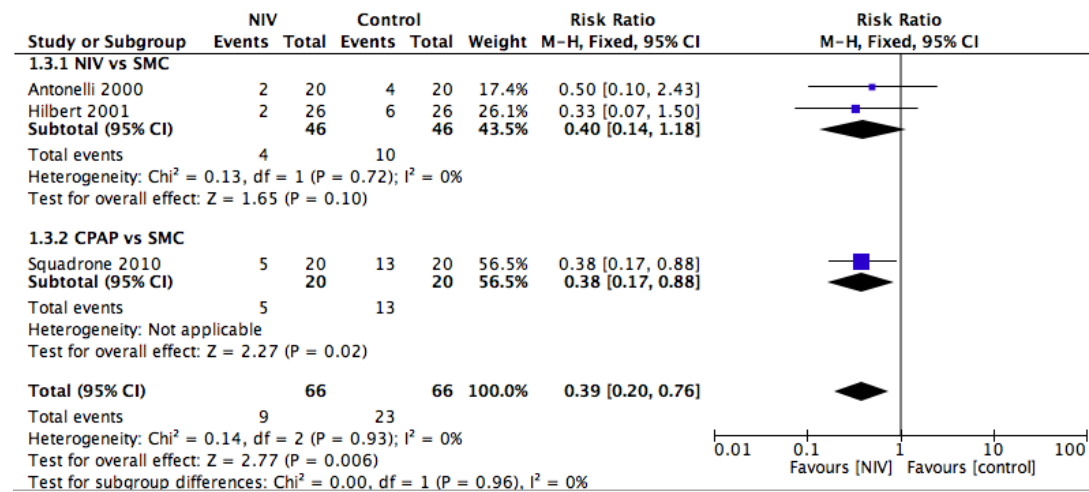

SMC = standard medical care

## Evidence Profile

| Quality assessment   |                   |                          |                      |                      |             |                      | № of patients  |                                                         | Effect                 |                                                  | Quality          | Importance |
|----------------------|-------------------|--------------------------|----------------------|----------------------|-------------|----------------------|----------------|---------------------------------------------------------|------------------------|--------------------------------------------------|------------------|------------|
| № of studies         | Study design      | Risk of bias             | Inconsistency        | Indirectness         | Imprecision | Other considerations | NIV            | supplemental oxygen +/- invasive mechanical ventilation | Relative (95% CI)      | Absolute (95% CI)                                |                  |            |
| Mortality            |                   |                          |                      |                      |             |                      |                |                                                         |                        |                                                  |                  |            |
| 4 [41-44]            | randomised trials | not serious <sup>1</sup> | serious <sup>2</sup> | not serious          | not serious | none                 | 68/257 (26.5%) | 97/249 (39.0%)                                          | RR 0.68 (0.53 to 0.88) | 125 fewer per 1,000 (from 47 fewer to 183 fewer) | ⊕⊕⊕○<br>MODERATE | CRITICAL   |
| Intubation           |                   |                          |                      |                      |             |                      |                |                                                         |                        |                                                  |                  |            |
| 4 [41-44]            | randomised trials | serious <sup>3</sup>     | not serious          | not serious          | not serious | none                 | 91/257 (35.4%) | 124/249 (49.8%)                                         | RR 0.71 (0.58 to 0.87) | 144 fewer per 1,000 (from 65 fewer to 209 fewer) | ⊕⊕⊕○<br>MODERATE | CRITICAL   |
| Nosocomial Pneumonia |                   |                          |                      |                      |             |                      |                |                                                         |                        |                                                  |                  |            |
| 3 [41, 42, 44]       | randomised trials | serious <sup>3</sup>     | not serious          | serious <sup>4</sup> | not serious | none                 | 9/66 (13.6%)   | 23/66 (34.8%)                                           | RR 0.39 (0.20 to 0.76) | 213 fewer per 1,000 (from 84 fewer to 279 fewer) | ⊕⊕○○<br>LOW      | CRITICAL   |

CI: Confidence interval; RR: Risk ratio, NIV – noninvasive ventilation, CI – Confidence interval

1. Intervention was not blinded but felt to be less important for objective outcome of mortality.
2. High Isquared value >80%.
3. Intervention was not blinded.
4. Variability in diagnosing nosocomial pneumonia.

## Question #5: Should NIV be used in de novo acute respiratory failure?

### Mortality

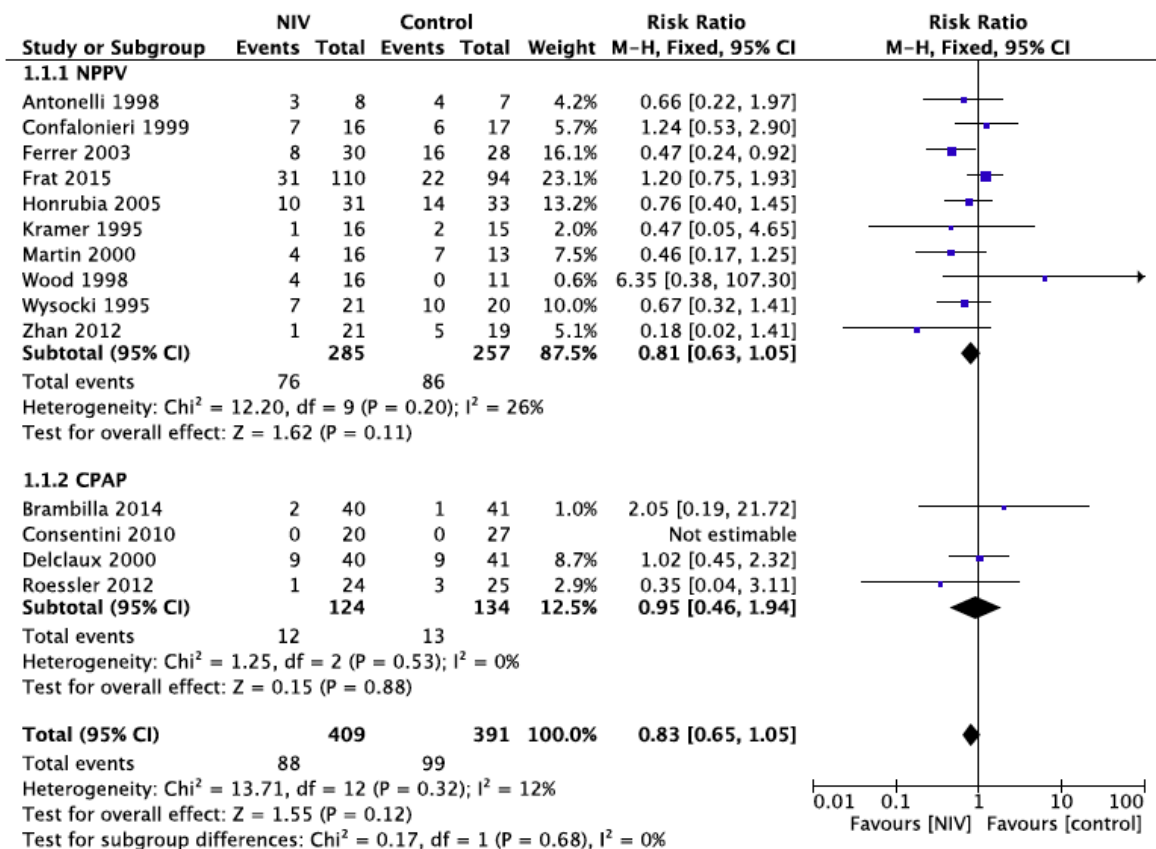



## Intubation

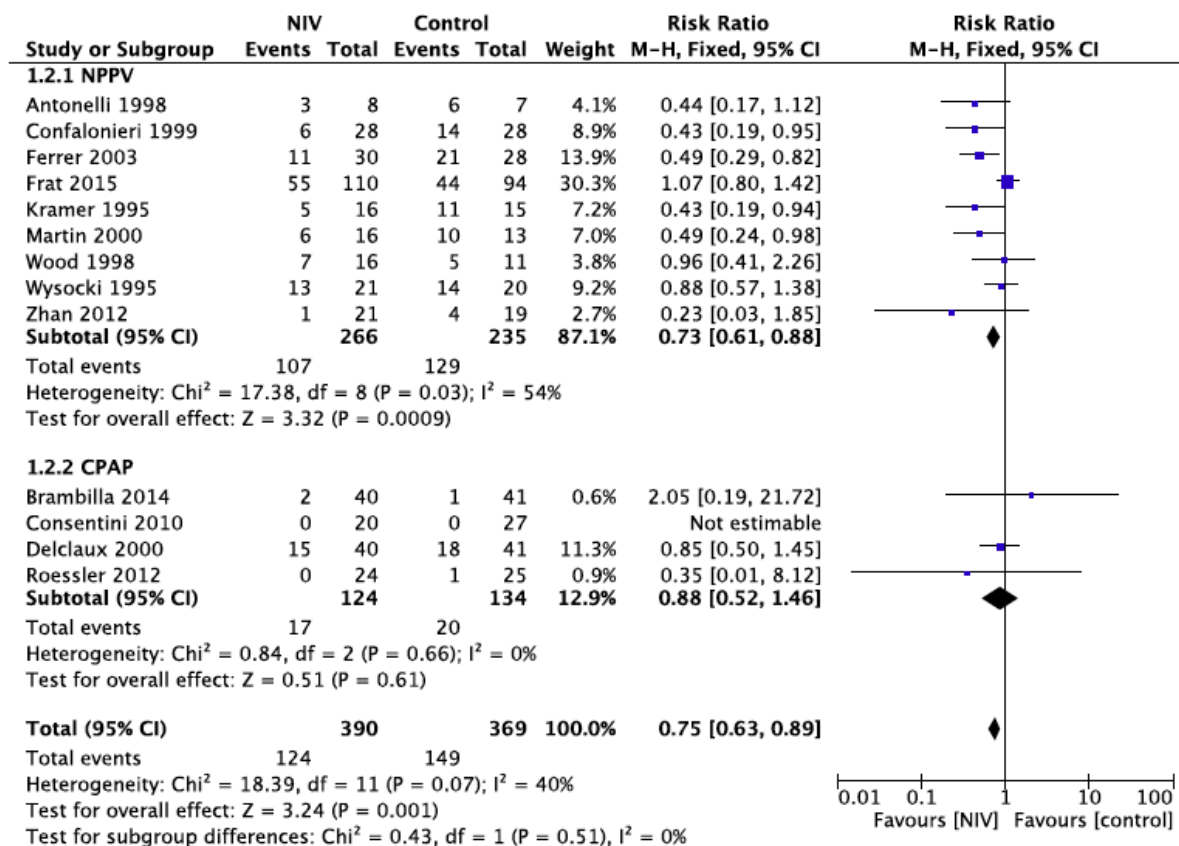

## Evidence Profile

| Quality assessment                           |                   |                      |               |                      |                      |                      | № of patients      |                                                         | Effect                    |                                                 | Quality                                                                                    | Importance |
|----------------------------------------------|-------------------|----------------------|---------------|----------------------|----------------------|----------------------|--------------------|---------------------------------------------------------|---------------------------|-------------------------------------------------|--------------------------------------------------------------------------------------------|------------|
| № of studies                                 | Study design      | Risk of bias         | Inconsistency | Indirectness         | Imprecision          | Other considerations | NIV                | supplemental oxygen +/- invasive mechanical ventilation | Relative (95% CI)         | Absolute (95% CI)                               |                                                                                            |            |
| Mortality (assessed with: Longest available) |                   |                      |               |                      |                      |                      |                    |                                                         |                           |                                                 |                                                                                            |            |
| 14<br>[13, 17, 36, 45-55]                    | randomised trials | not serious          | not serious   | serious <sup>1</sup> | serious <sup>2</sup> | none                 | 88/409<br>(21.5%)  | 99/391 (25.3%)                                          | RR 0.83<br>(0.65 to 1.05) | 43 fewer per 1000 (from 13 more to 89 fewer)    | <br>LOW | CRITICAL   |
| Intubation                                   |                   |                      |               |                      |                      |                      |                    |                                                         |                           |                                                 |                                                                                            |            |
| 13<br>[13, 17, 36, 45-51, 53-55]             | randomised trials | serious <sup>3</sup> | not serious   | serious <sup>1</sup> | not serious          | none                 | 124/390<br>(31.8%) | 149/369 (40.4%)                                         | RR 0.75<br>(0.63 to 0.89) | 101 fewer per 1000 (from 44 fewer to 149 fewer) | <br>LOW | CRITICAL   |

MD – mean difference, RR – relative risk, NIV – noninvasive ventilation, CI – Confidence interval

1. Most trials used standard medical care comparator, 1 used IMV comparator.
2. Wide confidence intervals do not exclude harm.
3. Lack of blinding in all studies.

## Question #6: Should NIV be used in the treatment of acute respiratory failure in postoperative patients?

### Mortality

#### 1.1.2 Treatment of ARF in postop patients

|                          |   |            |   |            |              |                          |
|--------------------------|---|------------|---|------------|--------------|--------------------------|
| Auriant 2001             | 3 | 24         | 9 | 24         | 38.3%        | 0.33 [0.10, 1.08]        |
| Squadron 2005            | 0 | 105        | 3 | 104        | 14.9%        | 0.14 [0.01, 2.71]        |
| <b>Subtotal (95% CI)</b> |   | <b>129</b> |   | <b>128</b> | <b>53.2%</b> | <b>0.28 [0.09, 0.84]</b> |

Total events

3

12

Heterogeneity:  $\text{Chi}^2 = 0.29$ ,  $\text{df} = 1$  ( $P = 0.59$ );  $I^2 = 0\%$

Test for overall effect:  $Z = 2.28$  ( $P = 0.02$ )

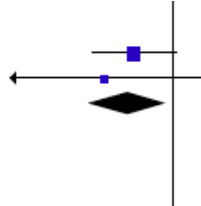

### Intubation

#### 1.2.2 Treatment of ARF in postop patients

|                          |   |            |    |            |              |                          |
|--------------------------|---|------------|----|------------|--------------|--------------------------|
| Auriant 2001             | 5 | 24         | 12 | 24         | 42.9%        | 0.42 [0.17, 1.00]        |
| Squadron 2005            | 1 | 105        | 10 | 104        | 35.9%        | 0.10 [0.01, 0.76]        |
| <b>Subtotal (95% CI)</b> |   | <b>129</b> |    | <b>128</b> | <b>78.9%</b> | <b>0.27 [0.12, 0.61]</b> |

Total events

6

22

Heterogeneity:  $\text{Chi}^2 = 1.85$ ,  $\text{df} = 1$  ( $P = 0.17$ );  $I^2 = 46\%$

Test for overall effect:  $Z = 3.13$  ( $P = 0.002$ )

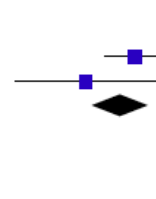

## Evidence Profile

| Quality assessment                           |                   |                          |               |                      |                      |                      | № of patients |                                                         | Effect                 |                                                 | Quality          | Importance |  |
|----------------------------------------------|-------------------|--------------------------|---------------|----------------------|----------------------|----------------------|---------------|---------------------------------------------------------|------------------------|-------------------------------------------------|------------------|------------|--|
| № of studies                                 | Study design      | Risk of bias             | Inconsistency | Indirectness         | Imprecision          | Other considerations | NIV           | supplemental oxygen +/- invasive mechanical ventilation | Relative (95% CI)      | Absolute (95% CI)                               |                  |            |  |
| Mortality (assessed with: longest available) |                   |                          |               |                      |                      |                      |               |                                                         |                        |                                                 |                  |            |  |
| 2 [56, 57]                                   | randomised trials | not serious <sup>1</sup> | not serious   | not serious          | serious <sup>2</sup> | none                 | 3/129 (2.3%)  | 12/128 (9.4%)                                           | RR 0.28 (0.09 to 0.84) | 68 fewer per 1000 (from 15 fewer to 85 fewer)   | ⊕⊕⊕○<br>MODERATE | CRITICAL   |  |
| Intubation                                   |                   |                          |               |                      |                      |                      |               |                                                         |                        |                                                 |                  |            |  |
| 2 [56, 57]                                   | randomised trials | serious <sup>3</sup>     | not serious   | not serious          | serious <sup>2</sup> | none                 | 6/129 (4.7%)  | 22/128 (17.2%)                                          | RR 0.27 (0.12 to 0.61) | 125 fewer per 1000 (from 67 fewer to 151 fewer) | ⊕⊕○○<br>LOW      | CRITICAL   |  |
| Nosocomial Pneumonia                         |                   |                          |               |                      |                      |                      |               |                                                         |                        |                                                 |                  |            |  |
| 1 [57]                                       | randomised trials | serious <sup>3</sup>     | not serious   | serious <sup>4</sup> | serious <sup>2</sup> | none                 | 2/105 (1.9%)  | 10/104 (9.6%)                                           | RR 0.20 (0.04 to 0.88) | 77 fewer per 1000 (from 12 fewer to 92 fewer)   | ⊕○○○<br>VERY LOW | CRITICAL   |  |

MD – mean difference, RR – relative risk, NIV – noninvasive ventilation, CI – Confidence interval

1. All studies unblinded but not considered ROB for outcome of mortality.
2. Very small number of events leads to high fragility index and lower certainty.
3. Lack of blinding may have affected outcome assessment.
4. Variability in diagnostic criteria used.

## Question #7: Should NIV be used in acute respiratory failure in palliative patients?

Dyspnea

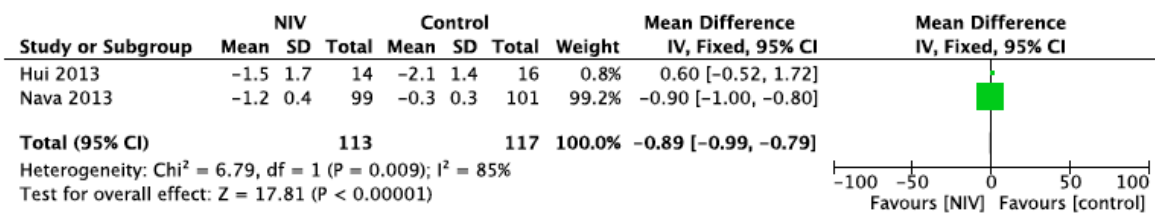

## Evidence Profile

| Quality assessment                                                               |                   |                      |                          |                      |                           |                      | № of patients |                     | Effect            |                                                      | Quality          | Importance |
|----------------------------------------------------------------------------------|-------------------|----------------------|--------------------------|----------------------|---------------------------|----------------------|---------------|---------------------|-------------------|------------------------------------------------------|------------------|------------|
| № of studies                                                                     | Study design      | Risk of bias         | Inconsistency            | Indirectness         | Imprecision               | Other considerations | NIV           | supplemental oxygen | Relative (95% CI) | Absolute (95% CI)                                    |                  |            |
| Dyspnea (follow up: 1 hour; assessed with: BORG scale, lower means less dyspnea) |                   |                      |                          |                      |                           |                      |               |                     |                   |                                                      |                  |            |
| 2<br>[58, 59]                                                                    | randomised trials | serious <sup>1</sup> | not serious <sup>2</sup> | not serious          | not serious               | none                 | 113           | 117                 | -                 | MD <b>0.89 lower</b><br>(0.99 lower to 0.79 lower)   | ⊕⊕⊕○<br>MODERATE | CRITICAL   |
| Respiratory Rate (follow up: 1 hour)                                             |                   |                      |                          |                      |                           |                      |               |                     |                   |                                                      |                  |            |
| 1<br>[58]                                                                        | randomised trials | serious <sup>1</sup> | not serious              | serious <sup>3</sup> | very serious <sup>4</sup> | none                 | 14            | 16                  | -                 | MD <b>1 higher</b><br>(2.3 lower to 4.3 higher)      | ⊕○○○<br>VERY LOW | IMPORTANT  |
| Oxygenation (follow up: 1 hour; assessed with: Change in O2 saturation)          |                   |                      |                          |                      |                           |                      |               |                     |                   |                                                      |                  |            |
| 1<br>[58]                                                                        | randomised trials | serious <sup>1</sup> | not serious              | serious <sup>3</sup> | very serious <sup>4</sup> | none                 | 14            | 16                  | -                 | MD <b>2 lower</b><br>(5.77 lower to 1.77 higher)     | ⊕○○○<br>VERY LOW | IMPORTANT  |
| Morphine Requirement (follow up: 2 days; assessed with: milligrams)              |                   |                      |                          |                      |                           |                      |               |                     |                   |                                                      |                  |            |
| 1<br>[59]                                                                        | randomised trials | serious <sup>1</sup> | not serious              | serious <sup>3</sup> | not serious               | none                 | 99            | 101                 | -                 | MD <b>32.4 lower</b><br>(47.41 lower to 17.39 lower) | ⊕⊕○○<br>LOW      | IMPORTANT  |

MD – mean difference, RR – relative risk, NIV – noninvasive ventilation, CI – Confidence interval

1. Unblinded intervention.
2. Results driven mostly by single study therefore insignificant inconsistency.
3. Surrogate outcome with unclear clinical implications to patients.
4. Wide confidence intervals do not exclude harm. Single study, small number of patients.

## Question #8: Should NIV be used in acute respiratory failure due trauma?

### Mortality

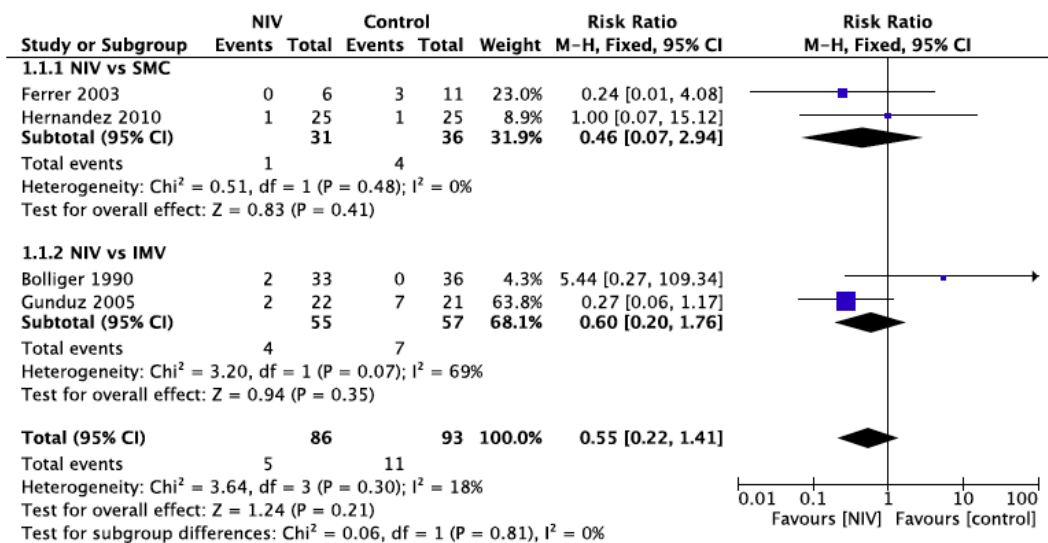

### Intubation

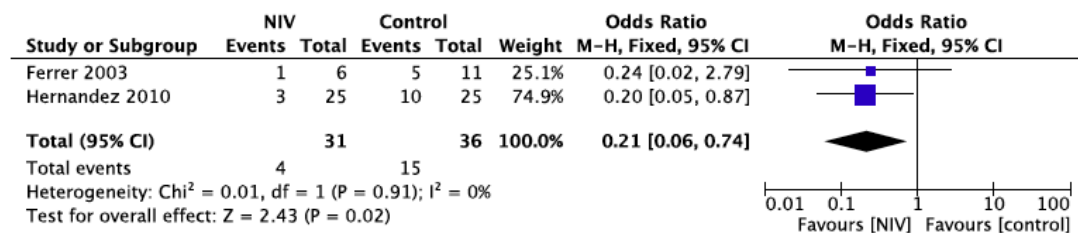

## ICU Length of Stay

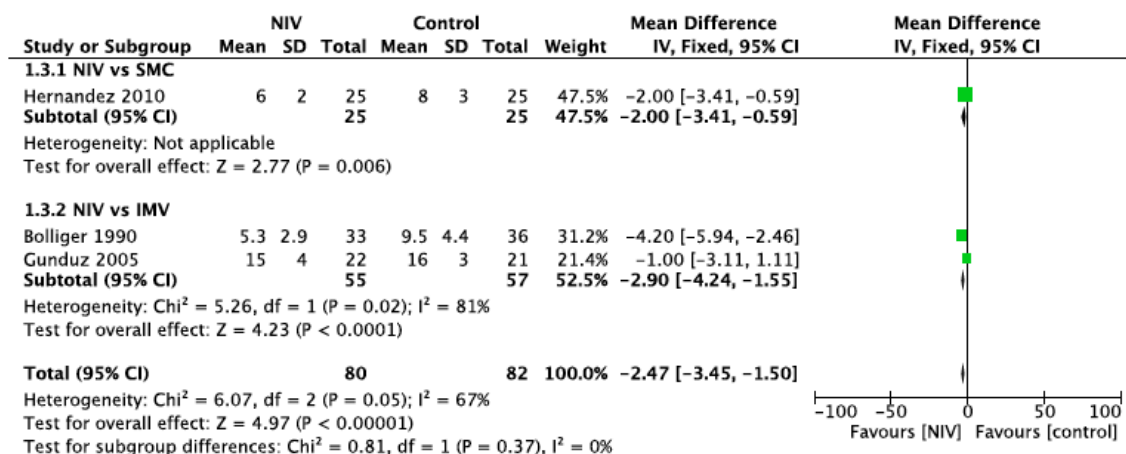

## Nosocomial Pneumonia

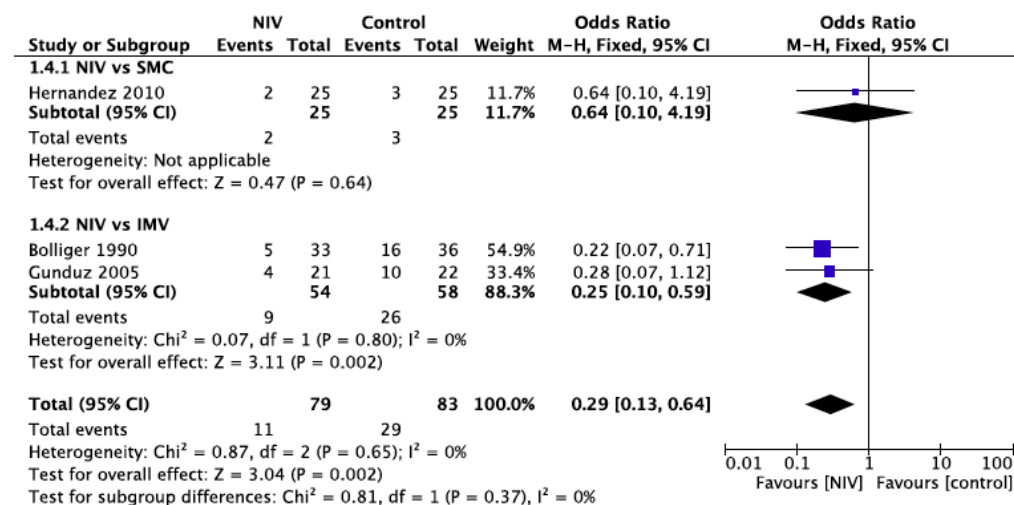



## Evidence Profile

| Quality assessment                       |                   |                          |               |                      |                      |                      | № of patients    |                                                         | Effect                           |                                                   | Quality                                                                                                | Importance |
|------------------------------------------|-------------------|--------------------------|---------------|----------------------|----------------------|----------------------|------------------|---------------------------------------------------------|----------------------------------|---------------------------------------------------|--------------------------------------------------------------------------------------------------------|------------|
| № of studies                             | Study design      | Risk of bias             | Inconsistency | Indirectness         | Imprecision          | Other considerations | NIV              | supplemental oxygen +/- invasive mechanical ventilation | Relative (95% CI)                | Absolute (95% CI)                                 |                                                                                                        |            |
| Mortality                                |                   |                          |               |                      |                      |                      |                  |                                                         |                                  |                                                   |                                                                                                        |            |
| 4<br>[50, 60-62]                         | randomised trials | not serious <sup>1</sup> | not serious   | not serious          | serious <sup>2</sup> | none                 | 5/86<br>(5.8%)   | 11/93 (11.8%)                                           | <b>RR 0.55</b><br>(0.22 to 1.41) | 53 fewer per 1000 (from 48 more to 92 fewer)      | <br><b>MODERATE</b> | CRITICAL   |
| Intubation                               |                   |                          |               |                      |                      |                      |                  |                                                         |                                  |                                                   |                                                                                                        |            |
| 2<br>[50, 62]                            | randomised trials | serious <sup>3</sup>     | not serious   | not serious          | not serious          | none                 | 4/31<br>(12.9%)  | 15/36 (41.7%)                                           | <b>OR 0.21</b><br>(0.06 to 0.74) | 329 fewer per 1000 (from 108 fewer to 392 fewer)  | <br><b>MODERATE</b> | CRITICAL   |
| ICU Length of Stay (assessed with: days) |                   |                          |               |                      |                      |                      |                  |                                                         |                                  |                                                   |                                                                                                        |            |
| 4<br>[50, 60-62]                         | randomised trials | serious <sup>3</sup>     | not serious   | not serious          | not serious          | none                 | 80               | 82                                                      | not estimable                    | <b>MD 2.47 lower</b><br>(3.45 lower to 1.5 lower) | <br><b>MODERATE</b> | IMPORTANT  |
| Nosocomial Pneumonia                     |                   |                          |               |                      |                      |                      |                  |                                                         |                                  |                                                   |                                                                                                        |            |
| 3<br>[60-62]                             | randomised trials | serious <sup>3</sup>     | not serious   | serious <sup>4</sup> | not serious          | none                 | 11/79<br>(13.9%) | 29/83 (34.9%)                                           | <b>OR 0.29</b><br>(0.13 to 0.64) | 248 fewer per 1000 (from 126 fewer to 304 fewer)  | <br><b>LOW</b>      | CRITICAL   |

MD – mean difference, RR – relative risk, NIV – noninvasive ventilation, CI – Confidence interval

1. Intervention was not blinded however not as important for outcome of mortality. Also Hernandez et al was stopped early for benefit however not lowered for ROB.
2. Wide confidence intervals.
3. Intervention was unblinded in included studies.
4. Variability in diagnosing nosocomial pneumonia.

## Question #9: Should NIV be used in acute respiratory failure due to pandemic viral illness

### Mortality

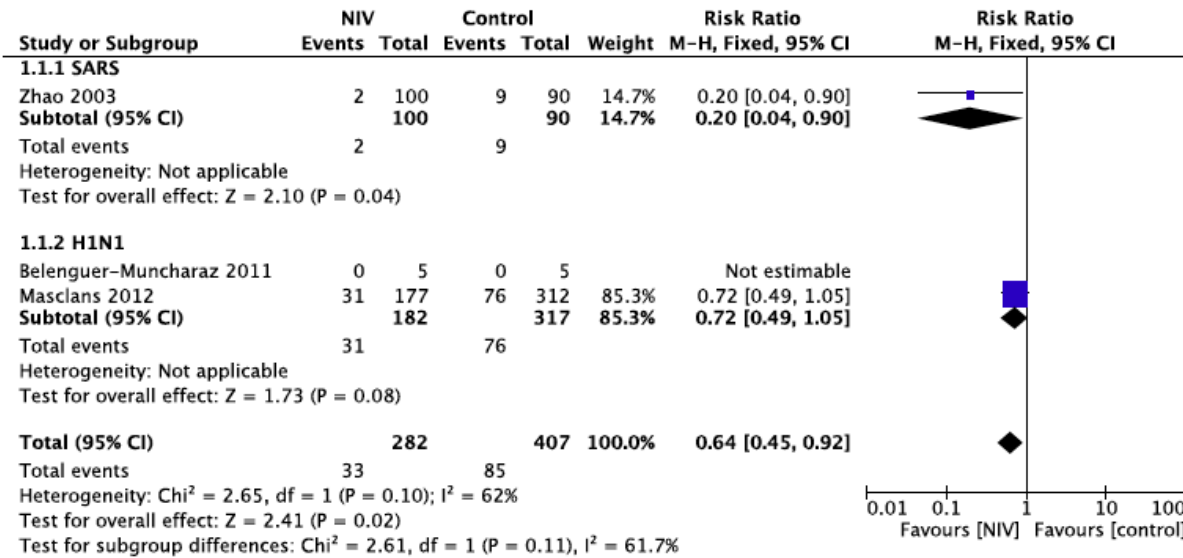

## Evidence Profile

| Quality assessment |                       |              |                      |              |                      |                      | № of patients  |                                                         | Effect                 |                                                 | Quality                                                                                      | Importance |
|--------------------|-----------------------|--------------|----------------------|--------------|----------------------|----------------------|----------------|---------------------------------------------------------|------------------------|-------------------------------------------------|----------------------------------------------------------------------------------------------|------------|
| № of studies       | Study design          | Risk of bias | Inconsistency        | Indirectness | Imprecision          | Other considerations | NIV            | supplemental oxygen +/- invasive mechanical ventilation | Relative (95% CI)      | Absolute (95% CI)                               |                                                                                              |            |
| Mortality          |                       |              |                      |              |                      |                      |                |                                                         |                        |                                                 |                                                                                              |            |
| 3 [63-65]          | observational studies | not serious  | serious <sup>1</sup> | not serious  | serious <sup>2</sup> | none                 | 33/282 (11.7%) | 85/407 (20.9%)                                          | RR 0.64 (0.45 to 0.92) | 75 fewer per 1,000 (from 17 fewer to 115 fewer) |  VERY LOW | CRITICAL   |

CI: Confidence interval; RR: Risk ratio, NIV – noninvasive ventilation, CI – Confidence interval

1. High Isquared (over 60%)
2. Low number of events

## Question #10a: Should NIV be used in the prevention of respiratory failure post extubation?

### Mortality

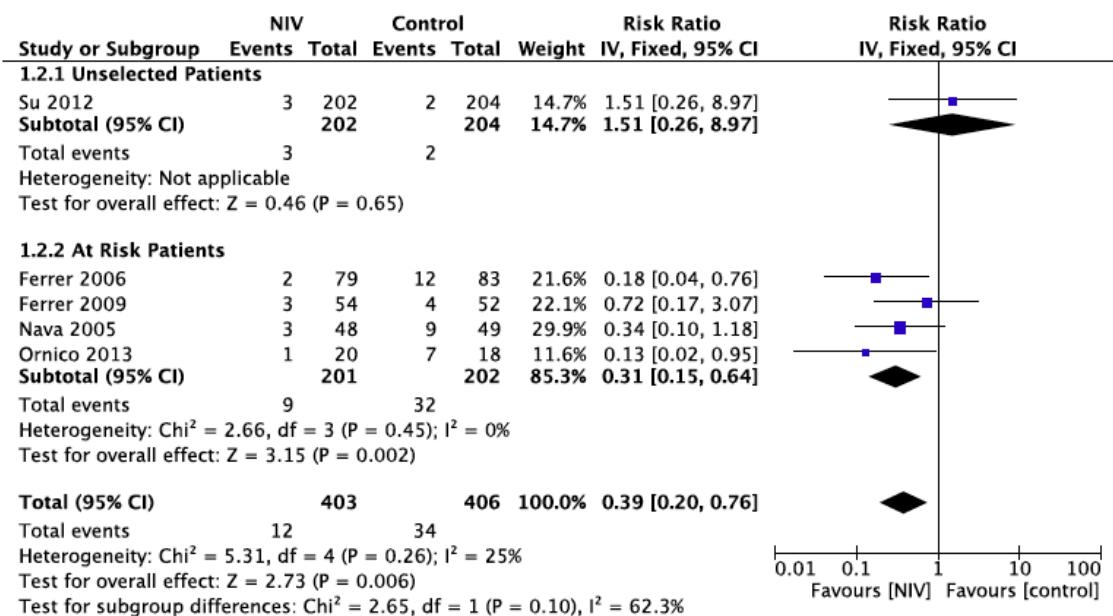

## Re-Intubation

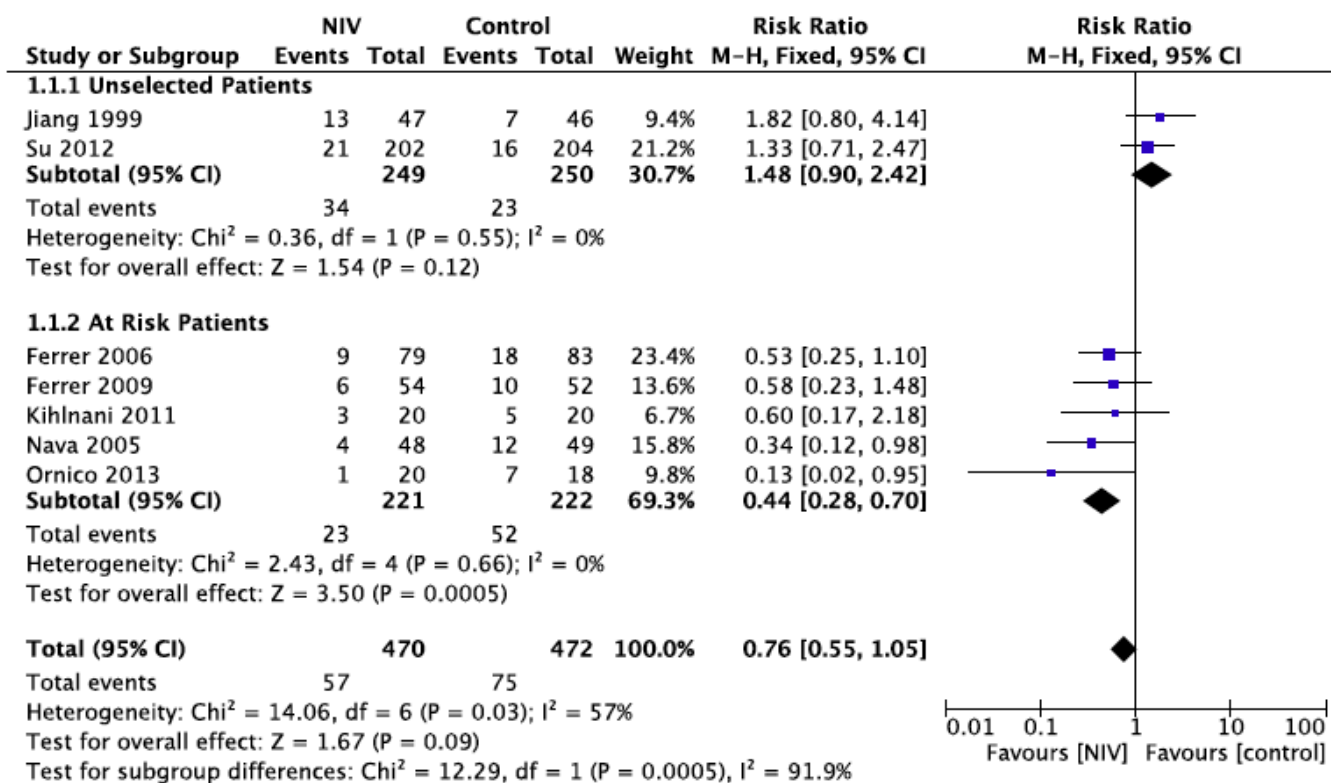

## Evidence Profile

| Quality assessment                            |                   |                      |               |              |                      |                      | № of patients  |                     | Effect                 |                                               | Quality          | Importance |
|-----------------------------------------------|-------------------|----------------------|---------------|--------------|----------------------|----------------------|----------------|---------------------|------------------------|-----------------------------------------------|------------------|------------|
| № of studies                                  | Study design      | Risk of bias         | Inconsistency | Indirectness | Imprecision          | Other considerations | NIV            | supplemental oxygen | Relative (95% CI)      | Absolute (95% CI)                             |                  |            |
| Mortality (assessed with: hospital mortality) |                   |                      |               |              |                      |                      |                |                     |                        |                                               |                  |            |
| 5 [66-70]                                     | randomised trials | not serious          | not serious   | not serious  | serious <sup>1</sup> | none                 | 11/383 (2.9%)  | 27/388 (7.0%)       | RR 0.41 (0.21 to 0.82) | 41 fewer per 1000 (from 13 fewer to 55 fewer) | ⊕⊕⊕○<br>MODERATE | CRITICAL   |
| Re-intubation                                 |                   |                      |               |              |                      |                      |                |                     |                        |                                               |                  |            |
| 7 [66-72]                                     | randomised trials | serious <sup>2</sup> | not serious   | not serious  | serious <sup>3</sup> | none                 | 79/538 (14.7%) | 101/542 (18.6%)     | RR 0.75 (0.49 to 1.15) | 47 fewer per 1000 (from 28 more to 95 fewer)  | ⊕⊕○○<br>LOW      | CRITICAL   |

MD – mean difference, RR – relative risk, NIV – noninvasive ventilation, CI – Confidence interval

1. Small number of events leading to high fragility index.
2. Unblinded intervention in all studies.
3. Wide confidence intervals do not exclude harm.

## Question #10b: Should NIV be used in the treatment of respiratory failure post extubation?

### Mortality & Re-intubation

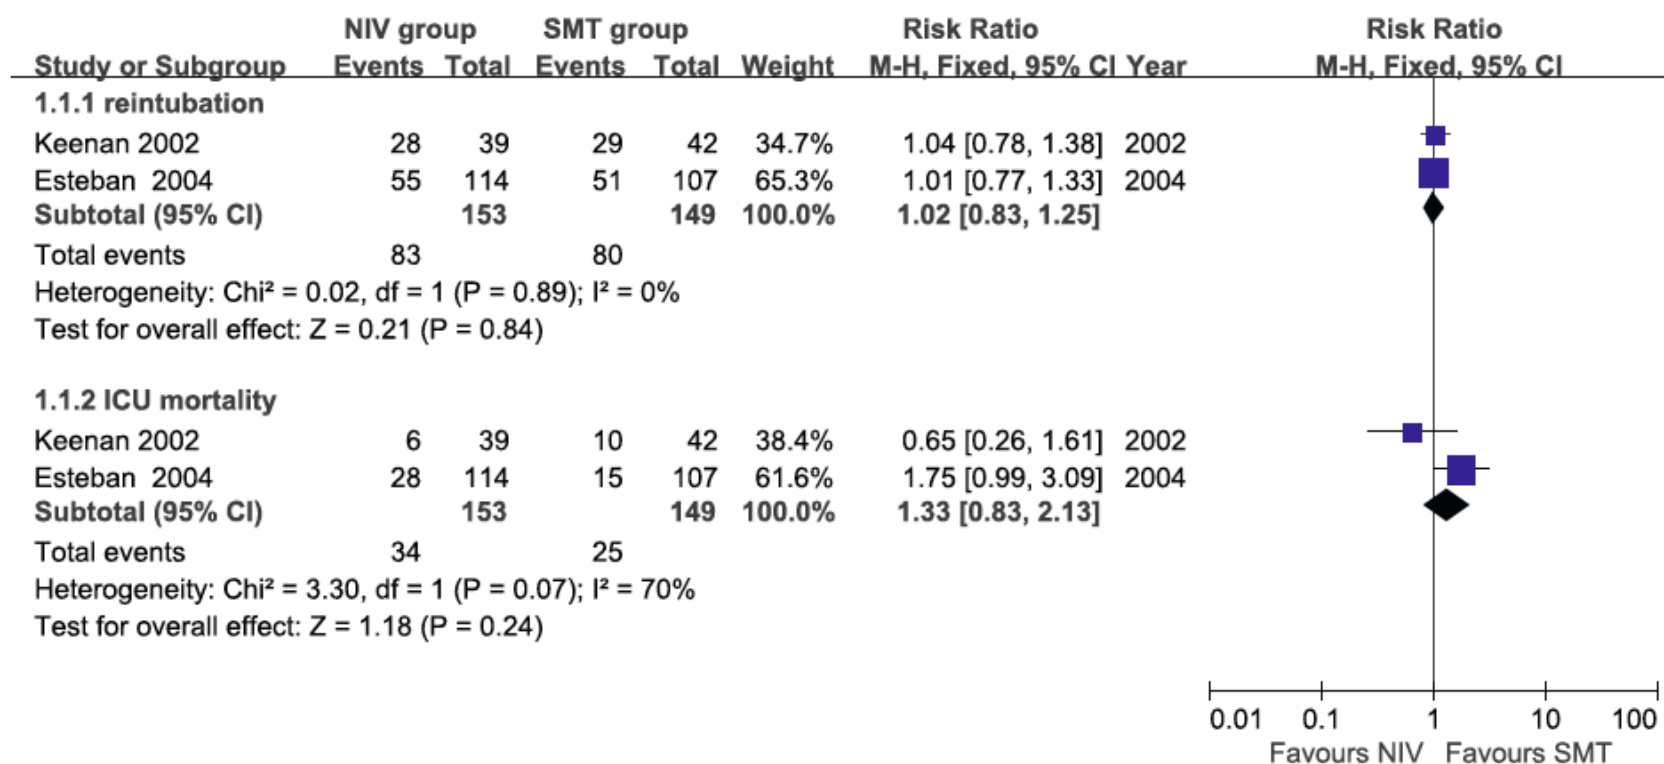

Reference: Changyang Lin, Dr, Huapeng Yu, MD, Huizhen Fan, Dr, Zhongli Li, Dr. The efficacy of noninvasive ventilation in managing postextubation respiratory failure: A meta-analysis. Heart & Lung 43 (2014) 99e104.

## Evidence Profile

| Quality assessment |                   |                      |                      |              |                      |                      | № of patients     |                                                         | Effect                    |                                                  | Quality                                                                                    | Importance |
|--------------------|-------------------|----------------------|----------------------|--------------|----------------------|----------------------|-------------------|---------------------------------------------------------|---------------------------|--------------------------------------------------|--------------------------------------------------------------------------------------------|------------|
| № of studies       | Study design      | Risk of bias         | Inconsistency        | Indirectness | Imprecision          | Other considerations | NIV               | supplemental oxygen +/- invasive mechanical ventilation | Relative (95% CI)         | Absolute (95% CI)                                |                                                                                            |            |
| ICU Mortality      |                   |                      |                      |              |                      |                      |                   |                                                         |                           |                                                  |                                                                                            |            |
| 2<br>[73, 74]      | randomised trials | not serious          | serious <sup>1</sup> | not serious  | serious <sup>2</sup> | none                 | 34/153<br>(22.2%) | 25/149 (16.8%)                                          | RR 1.33<br>(0.83 to 2.13) | 55 more per 1,000<br>(from 29 fewer to 190 more) | <br>LOW | CRITICAL   |
| Re-intubation      |                   |                      |                      |              |                      |                      |                   |                                                         |                           |                                                  |                                                                                            |            |
| 2<br>[73, 74]      | randomised trials | serious <sup>3</sup> | not serious          | not serious  | serious <sup>2</sup> | none                 | 83/153<br>(54.2%) | 80/149 (53.7%)                                          | RR 1.02<br>(0.83 to 1.25) | 11 more per 1,000<br>(from 91 fewer to 134 more) | <br>LOW | CRITICAL   |

**CI:** Confidence interval; **RR:** Risk ratio, NIV – noninvasive ventilation, CI – Confidence interval

1. High Isquared value and non-overlapping confidence intervals.
2. Wide confidence intervals do not exclude harm or benefit.
3. Unblinded intervention.



## Question #11: Should NIV be used in to facilitate weaning patients from invasive mechanical ventilation?

### Mortality

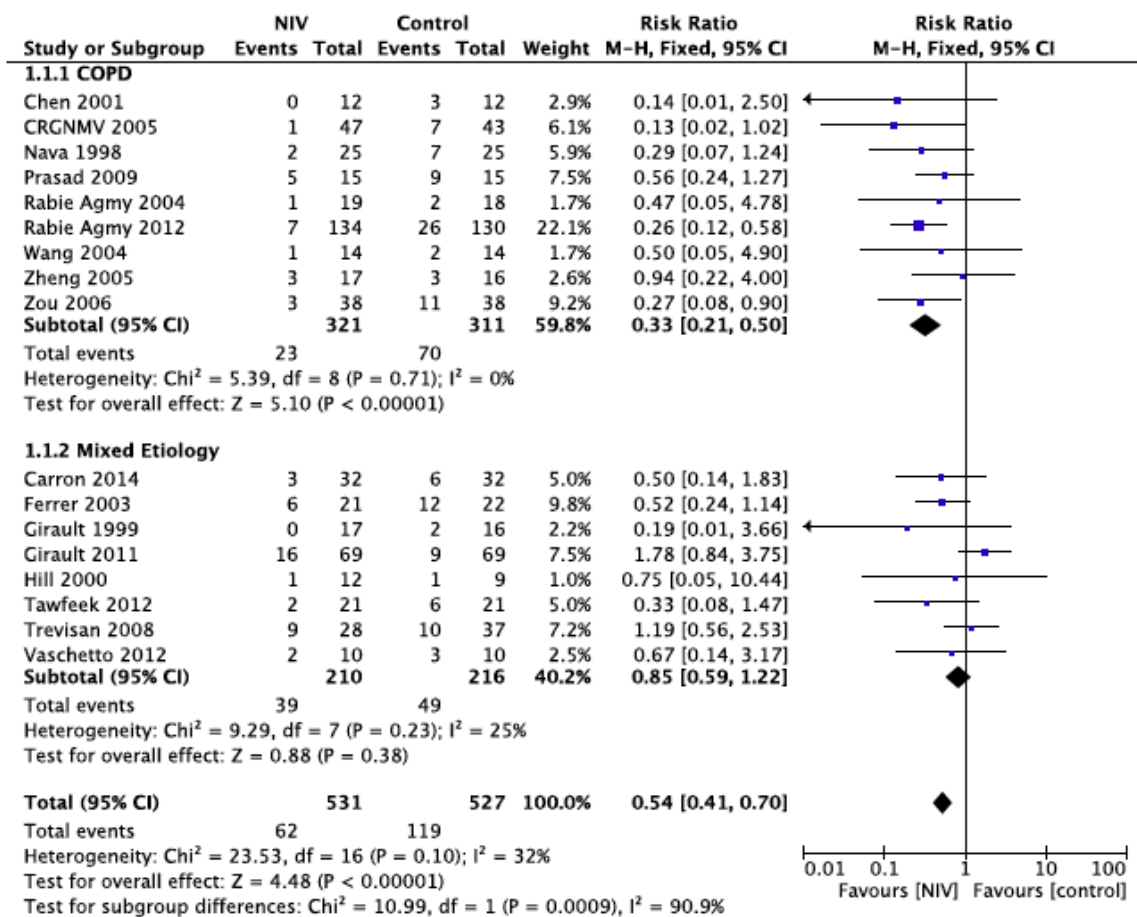

## Weaning Failure

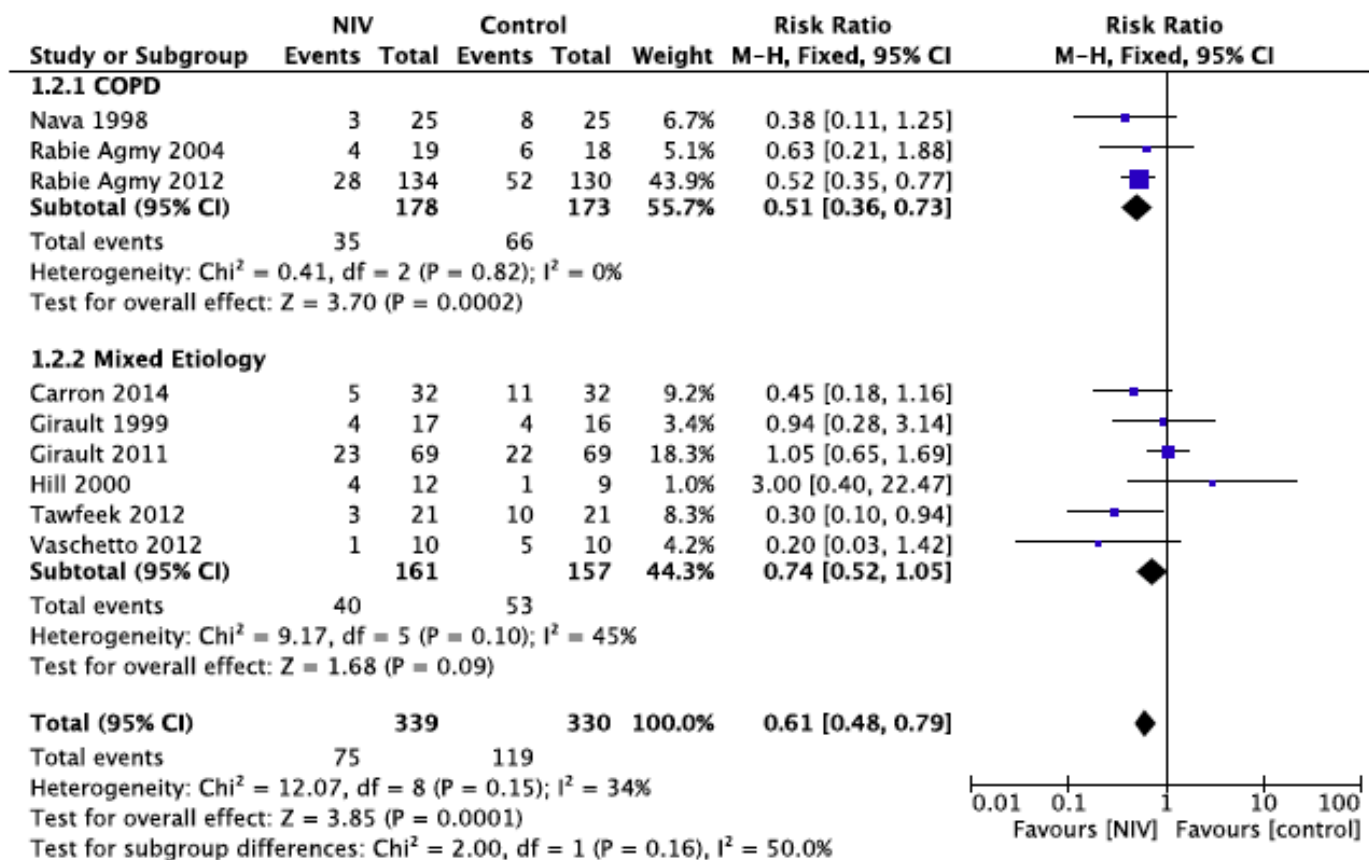

## Ventilator Associated Pneumonia

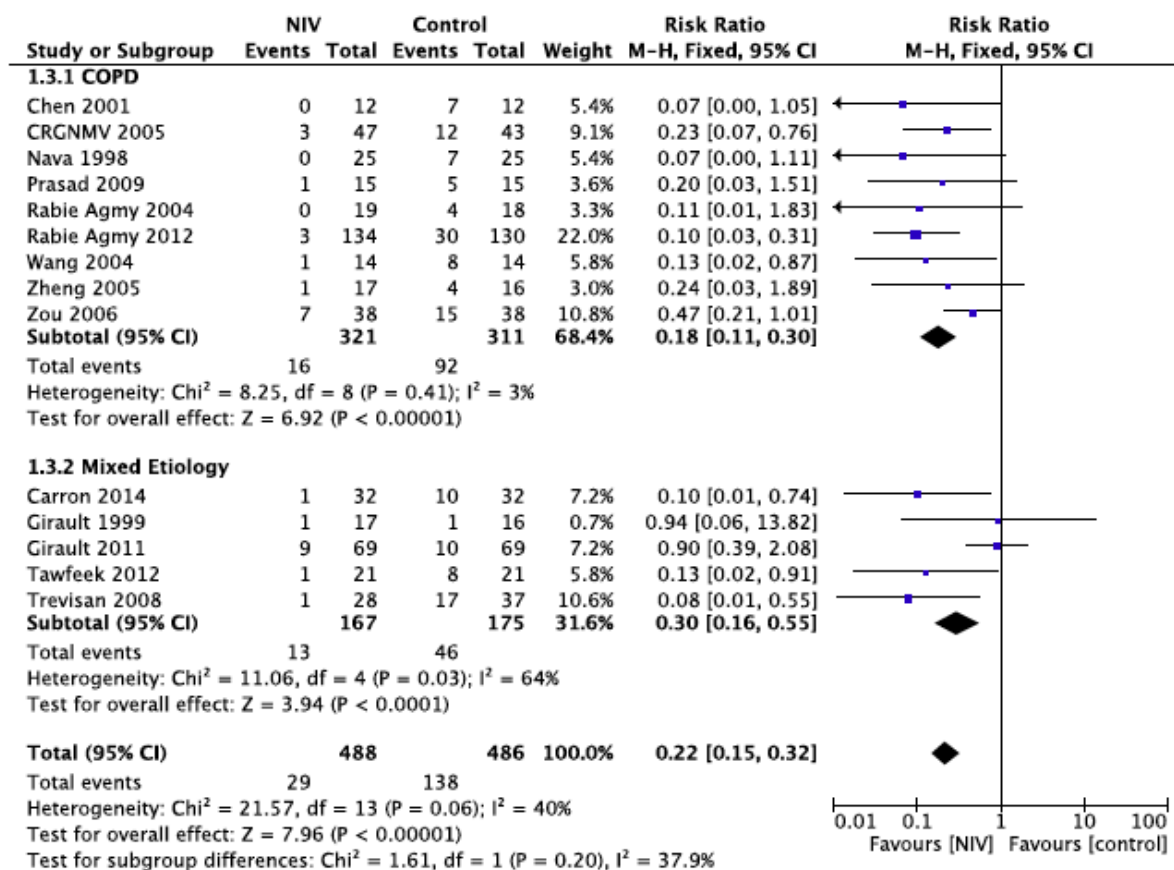

## Evidence Profile

| Quality assessment                  |                   |                          |               |                      |             |                      | № of patients     |                    | Effect                    |                                                  | Quality          | Importance |
|-------------------------------------|-------------------|--------------------------|---------------|----------------------|-------------|----------------------|-------------------|--------------------|---------------------------|--------------------------------------------------|------------------|------------|
| № of studies                        | Study design      | Risk of bias             | Inconsistency | Indirectness         | Imprecision | Other considerations | NIV               | routine practice   | Relative (95% CI)         | Absolute (95% CI)                                |                  |            |
| Mortality                           |                   |                          |               |                      |             |                      |                   |                    |                           |                                                  |                  |            |
| 17<br>[75-91]                       | randomised trials | not serious <sup>1</sup> | not serious   | serious <sup>2</sup> | not serious | none                 | 62/531<br>(11.7%) | 119/527<br>(22.6%) | RR 0.54<br>(0.41 to 0.70) | 104 fewer per 1000 (from 68 fewer to 133 fewer)  | ⊕⊕⊕○<br>MODERATE | CRITICAL   |
| Weaning Failure                     |                   |                          |               |                      |             |                      |                   |                    |                           |                                                  |                  |            |
| 9<br>[76, 79-82, 84-86, 88]         | randomised trials | serious <sup>3</sup>     | not serious   | serious <sup>4</sup> | not serious | none                 | 75/339<br>(22.1%) | 119/330<br>(36.1%) | RR 0.61<br>(0.48 to 0.79) | 141 fewer per 1000 (from 76 fewer to 188 fewer)  | ⊕⊕○○<br>LOW      | CRITICAL   |
| Ventilator Associated Pneumonia     |                   |                          |               |                      |             |                      |                   |                    |                           |                                                  |                  |            |
| 14<br>[75-77, 79, 80, 82-87, 89-91] | randomised trials | serious <sup>3</sup>     | not serious   | serious <sup>5</sup> | not serious | none                 | 29/488<br>(5.9%)  | 138/486<br>(28.4%) | RR 0.22<br>(0.15 to 0.32) | 221 fewer per 1000 (from 193 fewer to 241 fewer) | ⊕⊕○○<br>LOW      | CRITICAL   |

MD – mean difference, RR – relative risk, NIV – noninvasive ventilation, CI – Confidence interval

1. Despite a lack of blinding this was not judged to be as important for objective outcome of mortality.
2. Protocols for initiation of NIV varied including when to extubate.
3. Lack of blinding of the intervention affected overall ROB.
4. Weaning failure was heterogeniously defined across studies. Protocols for initiation of NIV also varied.
5. Different definitions of VAP employed. Also varying NIV protocols.

## **References:**

1. Early use of non-invasive positive pressure ventilation for acute exacerbations of chronic obstructive pulmonary disease: a multicentre randomized controlled trial. *Chinese medical journal* 2005: 118(24): 2034-2040.
2. Avdeev SN, Tret'iakov AV, Grigor'iants RA, Kutsenko MA, Chuchalin AG. [Study of the use of noninvasive ventilation of the lungs in acute respiratory insufficiency due exacerbation of chronic obstructive pulmonary disease]. *Anesteziologiya i reanimatologiya* 1998(3): 45-51.
3. Barbe F, Togores B, Rubi M, Pons S, Maimo A, Agusti AG. Noninvasive ventilatory support does not facilitate recovery from acute respiratory failure in chronic obstructive pulmonary disease. *The European respiratory journal* 1996: 9(6): 1240-1245.
4. Bardi G, Pierotello R, Desideri M, Valdisserri L, Bottai M, Palla A. Nasal ventilation in COPD exacerbations: early and late results of a prospective, controlled study. *The European respiratory journal* 2000: 15(1): 98-104.
5. Bott J, Carroll MP, Conway JH, Keilty SE, Ward EM, Brown AM, Paul EA, Elliott MW, Godfrey RC, Wedzicha JA, Moxham J, et al. Randomised controlled trial of nasal ventilation in acute ventilatory failure due to chronic obstructive airways disease. *Lancet (London, England)* 1993: 341(8860): 1555-1557.
6. Brochard L, Mancebo J, Wysocki M, Lofaso F, Conti G, Rauss A, Simonneau G, Benito S, Gasparetto A, Lemaire F, et al. Noninvasive ventilation for acute exacerbations of chronic obstructive pulmonary disease. *The New England journal of medicine* 1995: 333(13): 817-822.
7. Celikel T, Sungur M, Ceyhan B, Karakurt S. Comparison of noninvasive positive pressure ventilation with standard medical therapy in hypercapnic acute respiratory failure. *Chest* 1998: 114(6): 1636-1642.
8. Conti G, Antonelli M, Navalesi P, Rocco M, Bufi M, Spadetta G, Meduri GU. Noninvasive vs. conventional mechanical ventilation in patients with chronic obstructive pulmonary disease after failure of medical treatment in the ward: a randomized trial. *Intensive care medicine* 2002: 28(12): 1701-1707.
9. Dikensoy O, Ikidag B, Filiz A, Bayram N. Comparison of non-invasive ventilation and standard medical therapy in acute hypercapnic respiratory failure: a randomised controlled study at a tertiary health centre in SE Turkey. *International journal of clinical practice* 2002: 56(2): 85-88.
10. Jurjevic M, Matic I, Sakic-Zdravcevic K, Sakic S, Danic D, Bukovic D. Mechanical ventilation in chronic obstructive pulmonary disease patients, noninvasive vs. invasive method (randomized prospective study). *Collegium antropologicum* 2009: 33(3): 791-797.
11. Keenan SP, Powers CE, McCormack DG. Noninvasive positive-pressure ventilation in patients with milder chronic obstructive pulmonary disease exacerbations: a randomized controlled trial. *Respiratory care* 2005: 50(5): 610-616.
12. Khilnani GC, Saikia N, Banga A, Sharma SK. Non-invasive ventilation for acute exacerbation of COPD with very high PaCO<sub>2</sub>: A randomized controlled trial. *Lung India : official organ of Indian Chest Society* 2010: 27(3): 125-130.

13. Martin TJ, Hovis JD, Costantino JP, Bierman MI, Donahoe MP, Rogers RM, Kreit JW, Sciurba FC, Stiller RA, Sanders MH. A randomized, prospective evaluation of noninvasive ventilation for acute respiratory failure. *American journal of respiratory and critical care medicine* 2000; 161(3 Pt 1): 807-813.
14. Plant PK, Owen JL, Elliott MW. Early use of non-invasive ventilation for acute exacerbations of chronic obstructive pulmonary disease on general respiratory wards: a multicentre randomised controlled trial. *Lancet (London, England)* 2000; 355(9219): 1931-1935.
15. Carrera M, Marin JM, Anton A, Chiner E, Alonso ML, Masa JF, Marrades R, Sala E, Carrizo S, Giner J, Gomez-Merino E, Teran J, Disdier C, Agusti AG, Barbe F. A controlled trial of noninvasive ventilation for chronic obstructive pulmonary disease exacerbations. *Journal of critical care* 2009; 24(3): 473 e477-414.
16. del Castillo D, Barrot E, Laserna E, Otero R, Cayuela A, Castillo Gomez J. [Noninvasive positive pressure ventilation for acute respiratory failure in chronic obstructive pulmonary disease in a general respiratory ward]. *Medicina clinica* 2003; 120(17): 647-651.
17. Kramer N, Meyer TJ, Meharg J, Cece RD, Hill NS. Randomized, prospective trial of noninvasive positive pressure ventilation in acute respiratory failure. *American journal of respiratory and critical care medicine* 1995; 151(6): 1799-1806.
18. Thys F, Roeseler J, Reynaert M, Liistro G, Rodenstein DO. Noninvasive ventilation for acute respiratory failure: a prospective randomised placebo-controlled trial. *The European respiratory journal* 2002; 20(3): 545-555.
19. Crane SD, Elliott MW, Gilligan P, Richards K, Gray AJ. Randomised controlled comparison of continuous positive airways pressure, bilevel non-invasive ventilation, and standard treatment in emergency department patients with acute cardiogenic pulmonary oedema. *Emergency medicine journal : EMJ* 2004; 21(2): 155-161.
20. Ducros L, Logeart D, Vicaud E, Henry P, Plaisance P, Collet JP, Broche C, Gueye P, Vergne M, Goetgheber D, Pennec PY, Belpomme V, Tartiere JM, Lagarde S, Placente M, Fievet ML, Montalescot G, Payen D. CPAP for acute cardiogenic pulmonary oedema from out-of-hospital to cardiac intensive care unit: a randomised multicentre study. *Intensive care medicine* 2011; 37(9): 1501-1509.
21. Frontin P, Bounes V, Houze-Cerfon CH, Charpentier S, Houze-Cerfon V, Ducasse JL. Continuous positive airway pressure for cardiogenic pulmonary edema: a randomized study. *The American journal of emergency medicine* 2011; 29(7): 775-781.
22. Gray A, Goodacre S, Newby DE, Masson M, Sampson F, Nicholl J. Noninvasive ventilation in acute cardiogenic pulmonary edema. *The New England journal of medicine* 2008; 359(2): 142-151.
23. Kelly CA, Newby DE, McDonagh TA, Mackay TW, Barr J, Boon NA, Dargie HJ, Douglas NJ. Randomised controlled trial of continuous positive airway pressure and standard oxygen therapy in acute pulmonary oedema; effects on plasma brain natriuretic peptide concentrations. *European heart journal* 2002; 23(17): 1379-1386.
24. L'Her E. Noninvasive mechanical ventilation in acute cardiogenic pulmonary edema. *Current opinion in critical care* 2003; 9(1): 67-71.

25. Levitt MA. A prospective, randomized trial of BiPAP in severe acute congestive heart failure. *The Journal of emergency medicine* 2001; 21(4): 363-369.
26. Lin M, Yang YF, Chiang HT, Chang MS, Chiang BN, Cheitlin MD. Reappraisal of continuous positive airway pressure therapy in acute cardiogenic pulmonary edema. Short-term results and long-term follow-up. *Chest* 1995; 107(5): 1379-1386.
27. Masip J, Betbese AJ, Paez J, Vecilla F, Canizares R, Padro J, Paz MA, de Otero J, Ballus J. Non-invasive pressure support ventilation versus conventional oxygen therapy in acute cardiogenic pulmonary oedema: a randomised trial. *Lancet (London, England)* 2000; 356(9248): 2126-2132.
28. Nava S, Carbone G, DiBattista N, Bellone A, Baiardi P, Cosentini R, Marengo M, Giostra F, Borasi G, Groff P. Noninvasive ventilation in cardiogenic pulmonary edema: a multicenter randomized trial. *American journal of respiratory and critical care medicine* 2003; 168(12): 1432-1437.
29. Park M, Lorenzi-Filho G, Feltrim MI, Viecili PR, Sangean MC, Volpe M, Leite PF, Mansur AJ. Oxygen therapy, continuous positive airway pressure, or noninvasive bilevel positive pressure ventilation in the treatment of acute cardiogenic pulmonary edema. *Arquivos brasileiros de cardiologia* 2001; 76(3): 221-230.
30. Park M, Sangean MC, Volpe Mde S, Feltrim MI, Nozawa E, Leite PF, Passos Amato MB, Lorenzi-Filho G. Randomized, prospective trial of oxygen, continuous positive airway pressure, and bilevel positive airway pressure by face mask in acute cardiogenic pulmonary edema. *Critical care medicine* 2004; 32(12): 2407-2415.
31. Sharon A, Shpirer I, Kaluski E, Moshkovitz Y, Milovanov O, Polak R, Blatt A, Simovitz A, Shaham O, Faigenberg Z, Metzger M, Stav D, Yogev R, Golik A, Krakover R, Vered Z, Cotter G. High-dose intravenous isosorbide-dinitrate is safer and better than Bi-PAP ventilation combined with conventional treatment for severe pulmonary edema. *Journal of the American College of Cardiology* 2000; 36(3): 832-837.
32. Takeda S, Nejima J, Takano T, Nakanishi K, Takayama M, Sakamoto A, Ogawa R. Effect of nasal continuous positive airway pressure on pulmonary edema complicating acute myocardial infarction. *Japanese circulation journal* 1998; 62(8): 553-558.
33. Takeda S, Takano T, Ogawa R. The effect of nasal continuous positive airway pressure on plasma endothelin-1 concentrations in patients with severe cardiogenic pulmonary edema. *Anesthesia and analgesia* 1997; 84(5): 1091-1096.
34. Weitz G, Struck J, Zonak A, Balnus S, Perras B, Dodt C. Prehospital noninvasive pressure support ventilation for acute cardiogenic pulmonary edema. *European journal of emergency medicine : official journal of the European Society for Emergency Medicine* 2007; 14(5): 276-279.
35. Plaisance P, Pirracchio R, Berton C, Vicaut E, Payen D. A randomized study of out-of-hospital continuous positive airway pressure for acute cardiogenic pulmonary oedema: physiological and clinical effects. *European heart journal* 2007; 28(23): 2895-2901.

36. Roessler MS, Schmid DS, Michels P, Schmid O, Jung K, Stober J, Neumann P, Quintel M, Moerer O. Early out-of-hospital non-invasive ventilation is superior to standard medical treatment in patients with acute respiratory failure: a pilot study. *Emergency medicine journal : EMJ* 2012; 29(5): 409-414.
37. Thompson J, Petrie DA, Ackroyd-Stolarz S, Bardua DJ. Out-of-hospital continuous positive airway pressure ventilation versus usual care in acute respiratory failure: a randomized controlled trial. *Annals of emergency medicine* 2008; 52(3): 232-241, 241 e231.
38. Gupta D, Nath A, Agarwal R, Behera D. A prospective randomized controlled trial on the efficacy of noninvasive ventilation in severe acute asthma. *Respiratory care* 2010; 55(5): 536-543.
39. Soroksky A, Stav D, Shpirer I. A pilot prospective, randomized, placebo-controlled trial of bilevel positive airway pressure in acute asthmatic attack. *Chest* 2003; 123(4): 1018-1025.
40. Brandao DC, Lima VM, Filho VG, Silva TS, Campos TF, Dean E, de Andrade AD. Reversal of bronchial obstruction with bi-level positive airway pressure and nebulization in patients with acute asthma. *The Journal of asthma : official journal of the Association for the Care of Asthma* 2009; 46(4): 356-361.
41. Antonelli M, Conti G, Bufi M, Costa MG, Lappa A, Rocco M, Gasparetto A, Meduri GU. Noninvasive ventilation for treatment of acute respiratory failure in patients undergoing solid organ transplantation: a randomized trial. *Jama* 2000; 283(2): 235-241.
42. Hilbert G, Gruson D, Vargas F, Valentino R, Gbikpi-Benissan G, Dupon M, Reiffers J, Cardinaud JP. Noninvasive ventilation in immunosuppressed patients with pulmonary infiltrates, fever, and acute respiratory failure. *The New England journal of medicine* 2001; 344(7): 481-487.
43. Lemiale V, Mokart D, Resche-Rigon M, Pene F, Mayaux J, Faucher E, Nyunga M, Girault C, Perez P, Guitton C, Ekpe K, Kouatchet A, Theodose I, Benoit D, Canet E, Barbier F, Rabbat A, Bruneel F, Vincent F, Klouche K, Loay K, Mariotte E, Bouadma L, Moreau AS, Seguin A, Meert AP, Reignier J, Papazian L, Mehzari I, Cohen Y, Schenck M, Hamidfar R, Darmon M, Demoule A, Chevret S, Azoulay E. Effect of Noninvasive Ventilation vs Oxygen Therapy on Mortality Among Immunocompromised Patients With Acute Respiratory Failure: A Randomized Clinical Trial. *Jama* 2015; 314(16): 1711-1719.
44. Squadrone V, Massaia M, Bruno B, Marmont F, Falda M, Bagna C, Bertone S, Filippini C, Slutsky AS, Vitolo U, Boccadoro M, Ranieri VM. Early CPAP prevents evolution of acute lung injury in patients with hematologic malignancy. *Intensive care medicine* 2010; 36(10): 1666-1674.
45. Antonelli M, Conti G, Rocco M, Bufi M, De Blasi RA, Vivino G, Gasparetto A, Meduri GU. A comparison of noninvasive positive-pressure ventilation and conventional mechanical ventilation in patients with acute respiratory failure. *The New England journal of medicine* 1998; 339(7): 429-435.
46. Brambilla AM, Aliberti S, Prina E, Nicoli F, Del Forno M, Nava S, Ferrari G, Corradi F, Pelosi P, Bignamini A, Tarsia P, Cosentini R. Helmet CPAP vs. oxygen therapy in severe hypoxemic respiratory failure due to pneumonia. *Intensive care medicine* 2014; 40(7): 942-949.



47. Confalonieri M, Potena A, Carbone G, Porta RD, Tolley EA, Umberto Meduri G. Acute respiratory failure in patients with severe community-acquired pneumonia. A prospective randomized evaluation of noninvasive ventilation. *American journal of respiratory and critical care medicine* 1999; 160(5 Pt 1): 1585-1591.
48. Cosentini R, Brambilla AM, Aliberti S, Bignamini A, Nava S, Maffei A, Martinotti R, Tarsia P, Monzani V, Pelosi P. Helmet continuous positive airway pressure vs oxygen therapy to improve oxygenation in community-acquired pneumonia: a randomized, controlled trial. *Chest* 2010; 138(1): 114-120.
49. Delclaux C, L'Her E, Alberti C, Mancebo J, Abroug F, Conti G, Guerin C, Schortgen F, Lefort Y, Antonelli M, Lepage E, Lemaire F, Brochard L. Treatment of acute hypoxemic nonhypercapnic respiratory insufficiency with continuous positive airway pressure delivered by a face mask: A randomized controlled trial. *Jama* 2000; 284(18): 2352-2360.
50. Ferrer M, Esquinas A, Leon M, Gonzalez G, Alarcon A, Torres A. Noninvasive ventilation in severe hypoxemic respiratory failure: a randomized clinical trial. *American journal of respiratory and critical care medicine* 2003; 168(12): 1438-1444.
51. Frat JP, Thille AW, Mercat A, Girault C, Ragot S, Perbet S, Prat G, Boulain T, Morawiec E, Cottureau A, Devaquet J, Nseir S, Razazi K, Mira JP, Argaud L, Chakarian JC, Ricard JD, Wittebole X, Chevalier S, Herblant A, Fartoukh M, Constantin JM, Tonnelier JM, Pierrot M, Mathonnet A, Beduneau G, Deletage-Metreau C, Richard JC, Brochard L, Robert R. High-flow oxygen through nasal cannula in acute hypoxemic respiratory failure. *The New England journal of medicine* 2015; 372(23): 2185-2196.
52. Honrubia T, Garcia Lopez FJ, Franco N, Mas M, Guevara M, Daguerre M, Alia I, Algora A, Galdos P. Noninvasive vs conventional mechanical ventilation in acute respiratory failure: a multicenter, randomized controlled trial. *Chest* 2005; 128(6): 3916-3924.
53. Wood KA, Lewis L, Von Harz B, Kollef MH. The use of noninvasive positive pressure ventilation in the emergency department: results of a randomized clinical trial. *Chest* 1998; 113(5): 1339-1346.
54. Wysocki M, Tric L, Wolff MA, Millet H, Herman B. Noninvasive pressure support ventilation in patients with acute respiratory failure. A randomized comparison with conventional therapy. *Chest* 1995; 107(3): 761-768.
55. Zhan Q, Sun B, Liang L, Yan X, Zhang L, Yang J, Wang L, Ma Z, Shi L, Wei L, Li G, Yang L, Shi Z, Chen Y, Xu Q, Li W, Zhu X, Wang Z, Sun Y, Zhuo J, Liu Y, Li X, Wang C. Early use of noninvasive positive pressure ventilation for acute lung injury: a multicenter randomized controlled trial. *Critical care medicine* 2012; 40(2): 455-460.
56. Auriant I, Jallot A, Herve P, Cerrina J, Le Roy Ladurie F, Fournier JL, Lescot B, Parquin F. Noninvasive ventilation reduces mortality in acute respiratory failure following lung resection. *American journal of respiratory and critical care medicine* 2001; 164(7): 1231-1235.
57. Squadrone V, Coxa M, Cerutti E, Schellino MM, Biolino P, Occella P, Belloni G, Vilianis G, Fiore G, Cavallo F, Ranieri VM. Continuous positive airway pressure for treatment of postoperative hypoxemia: a randomized controlled trial. *Jama* 2005; 293(5): 589-595.

58. Hui D, Morgado M, Chisholm G, Withers L, Nguyen Q, Finch C, Frisbee-Hume S, Bruera E. High-flow oxygen and bilevel positive airway pressure for persistent dyspnea in patients with advanced cancer: a phase II randomized trial. *Journal of pain and symptom management* 2013; 46(4): 463-473.
59. Nava S, Ferrer M, Esquinas A, Scala R, Groff P, Cosentini R, Guido D, Lin CH, Cuomo AM, Grassi M. Palliative use of non-invasive ventilation in end-of-life patients with solid tumours: a randomised feasibility trial. *The Lancet Oncology* 2013; 14(3): 219-227.
60. Bolliger CT, Van Eeden SF. Treatment of multiple rib fractures. Randomized controlled trial comparing ventilatory with nonventilatory management. *Chest* 1990; 97(4): 943-948.
61. Gunduz M, Unlugenc H, Ozalevli M, Inanoglu K, Akman H. A comparative study of continuous positive airway pressure (CPAP) and intermittent positive pressure ventilation (IPPV) in patients with flail chest. *Emergency medicine journal : EMJ* 2005; 22(5): 325-329.
62. Hernandez G, Fernandez R, Lopez-Reina P, Cuenca R, Pedrosa A, Ortiz R, Hiradier P. Noninvasive ventilation reduces intubation in chest trauma-related hypoxemia: a randomized clinical trial. *Chest* 2010; 137(1): 74-80.
63. Belenguer-Muncharaz A, Reig-Valero R, Altaba-Tena S, Casero-Roig P, Ferrandiz-Selles A. [Noninvasive mechanical ventilation in severe pneumonia due to H1N1 virus]. *Medicina intensiva* 2011; 35(8): 470-477.
64. Masclans JR, Perez M, Almirall J, Lorente L, Marques A, Socias L, Vidaur L, Rello J. Early non-invasive ventilation treatment for severe influenza pneumonia. *Clinical microbiology and infection : the official publication of the European Society of Clinical Microbiology and Infectious Diseases* 2013; 19(3): 249-256.
65. Zhao Z, Zhang F, Xu M, Huang K, Zhong W, Cai W, Yin Z, Huang S, Deng Z, Wei M, Xiong J, Hawkey PM. Description and clinical treatment of an early outbreak of severe acute respiratory syndrome (SARS) in Guangzhou, PR China. *Journal of medical microbiology* 2003; 52(Pt 8): 715-720.
66. Ferrer M, Sellares J, Valencia M, Carrillo A, Gonzalez G, Badia JR, Nicolas JM, Torres A. Non-invasive ventilation after extubation in hypercapnic patients with chronic respiratory disorders: randomised controlled trial. *Lancet (London, England)* 2009; 374(9695): 1082-1088.
67. Ferrer M, Valencia M, Nicolas JM, Bernadich O, Badia JR, Torres A. Early noninvasive ventilation averts extubation failure in patients at risk: a randomized trial. *American journal of respiratory and critical care medicine* 2006; 173(2): 164-170.
68. Nava S, Gregoret C, Fanfulla F, Squadrone E, Grassi M, Carlucci A, Beltrame F, Navalesi P. Noninvasive ventilation to prevent respiratory failure after extubation in high-risk patients. *Critical care medicine* 2005; 33(11): 2465-2470.
69. Ornicio SR, Lobo SM, Sanches HS, Deberaldini M, Tofoli LT, Vidal AM, Schettino GP, Amato MB, Carvalho CR, Barbas CS. Noninvasive ventilation immediately after extubation improves weaning outcome after acute respiratory failure: a randomized controlled trial. *Critical care (London, England)* 2013; 17(2): R39.
70. Su CL, Chiang LL, Yang SH, Lin HI, Cheng KC, Huang YC, Wu CP. Preventive use of noninvasive ventilation after extubation: a prospective, multicenter randomized controlled trial. *Respiratory care* 2012; 57(2): 204-210.

71. Jiang JS, Kao SJ, Wang SN. Effect of early application of biphasic positive airway pressure on the outcome of extubation in ventilator weaning. *Respirology (Carlton, Vic)* 1999; 4(2): 161-165.
72. Khilnani GC, Galle AD, Hadda V, Sharma SK. Non-invasive ventilation after extubation in patients with chronic obstructive airways disease: a randomised controlled trial. *Anaesthesia and intensive care* 2011; 39(2): 217-223.
73. Esteban A, Frutos-Vivar F, Ferguson ND, Arabi Y, Apezteguia C, Gonzalez M, Epstein SK, Hill NS, Nava S, Soares MA, D'Empaire G, Alia I, Anzueto A. Noninvasive positive-pressure ventilation for respiratory failure after extubation. *The New England journal of medicine* 2004; 350(24): 2452-2460.
74. Keenan SP, Powers C, McCormack DG, Block G. Noninvasive positive-pressure ventilation for postextubation respiratory distress: a randomized controlled trial. *Jama* 2002; 287(24): 3238-3244.
75. Pulmonary infection control window in treatment of severe respiratory failure of chronic obstructive pulmonary diseases: a prospective, randomized controlled, multi-centred study. *Chinese medical journal* 2005; 118(19): 1589-1594.
76. Carron M, Rossi S, Carollo C, Ori C. Comparison of invasive and noninvasive positive pressure ventilation delivered by means of a helmet for weaning of patients from mechanical ventilation. *Journal of critical care* 2014; 29(4): 580-585.
77. Chen J, Qiu D, Tao D. [Time for extubation and sequential noninvasive mechanical ventilation in COPD patients with exacerbated respiratory failure who received invasive ventilation]. *Zhonghua jie he he hu xi za zhi = Zhonghua jiehe he huxi zazhi = Chinese journal of tuberculosis and respiratory diseases* 2001; 24(2): 99-100.
78. Ferrer M, Esquinas A, Arancibia F, Bauer TT, Gonzalez G, Carrillo A, Rodriguez-Roisin R, Torres A. Noninvasive ventilation during persistent weaning failure: a randomized controlled trial. *American journal of respiratory and critical care medicine* 2003; 168(1): 70-76.
79. Girault C, Bubenheim M, Abroug F, Diehl JL, Elatrous S, Beuret P, Richecoeur J, L'Her E, Hilbert G, Capellier G, Rabbat A, Besbes M, Guerin C, Guiot P, Benichou J, Bonmarchand G. Noninvasive ventilation and weaning in patients with chronic hypercapnic respiratory failure: a randomized multicenter trial. *American journal of respiratory and critical care medicine* 2011; 184(6): 672-679.
80. Girault C, Daudenthun I, Chevron V, Tamion F, Leroy J, Bonmarchand G. Noninvasive ventilation as a systematic extubation and weaning technique in acute-on-chronic respiratory failure: a prospective, randomized controlled study. *American journal of respiratory and critical care medicine* 1999; 160(1): 86-92.
81. Hill NS LD, Levy M, et al. Noninvasive positive pressure ventilation (NPPV) to facilitate extubation after acute respiratory failure: a feasibility study. *American journal of respiratory and critical care medicine* 2000; 161: B18.
82. Nava S, Ambrosino N, Clini E, Prato M, Orlando G, Vitacca M, Brigada P, Fracchia C, Rubini F. Noninvasive mechanical ventilation in the weaning of patients with respiratory failure due to chronic obstructive pulmonary disease. A randomized, controlled trial. *Annals of internal medicine* 1998; 128(9): 721-728.

83. Prasad SB, Chaudhry D, Khanna R. Role of noninvasive ventilation in weaning from mechanical ventilation in patients of chronic obstructive pulmonary disease: an Indian experience. *Indian journal of critical care medicine : peer-reviewed, official publication of Indian Society of Critical Care Medicine* 2009; 13(4): 207-212.
84. Rabie Agmy GM MA, Mohamed RN. Noninvasive ventilation in the weaning of patients with acute-on-chronic respiratory failure due to COPD. *Chest* 2004; 126(suppl 4): 755.
85. Rabie Agmy GM MM. Noninvasive ventilation in the weaning of patients with acute-on-chronic respiratory failure due to COPD. *Egyptian J Chest Dis Tuberculosis* 2012; 61: 84-91.
86. Tawfeek MM A-EA. Noninvasive proportional assist ventilation may be useful in weaning patients who failed a spontaneous breathing trial. . *Egyptian J Anaesthesia* 2012; 28: 89-94.
87. Trevisan CE, Vieira SR. Noninvasive mechanical ventilation may be useful in treating patients who fail weaning from invasive mechanical ventilation: a randomized clinical trial. *Critical care (London, England)* 2008; 12(2): R51.
88. Vaschetto R, Turucz E, Dellapiazza F, Guido S, Colombo D, Cammarota G, Della Corte F, Antonelli M, Navalesi P. Noninvasive ventilation after early extubation in patients recovering from hypoxemic acute respiratory failure: a single-centre feasibility study. *Intensive care medicine* 2012; 38(10): 1599-1606.
89. Wang X DX, Zhang W. . Observation of the results and discussion on the timing of transition from invasive mechanical ventilation to noninvasive ventilation in COPD patients with concomitant acute respiratory failure. *Shandong Med* 2004; 44: 4-6.
90. Zheng R LL, Yang Y. . Prospective randomized controlled clinical study of sequential noninvasive following invasive mechanical ventilation in patients with acute respiratory failure induced COPD. *Chinese J Emerg Med* 2005; 14: 21-25.
91. Zou SH, Zhou R, Chen P, Luo H, Xiang XD, Lu YD, Zhu LY. [Application of sequential noninvasive following invasive mechanical ventilation in COPD patients with severe respiratory failure by investigating the appearance of pulmonary-infection-control-window]. *Zhong nan da xue xue bao Yi xue ban = Journal of Central South University Medical sciences* 2006; 31(1): 120-124.
